# Supplementary material
Source: publisher site journal article supplement (https://www.apsnet.org/edcenter/foreducators/TeachingNotes/Documents/PHI-L-2023-05-0003_supplemental_Slides.pdf)
Supplement: Supplementary file 1 [file PHI-L-2023-05-0003_supplemental_Slides.pdf]

# Assessment of foliar fungal diseases of plants

**Eva Mulandesa**  
**Galvin Alonzo**

**Advisor:**  
Brantlee Spakes Richter

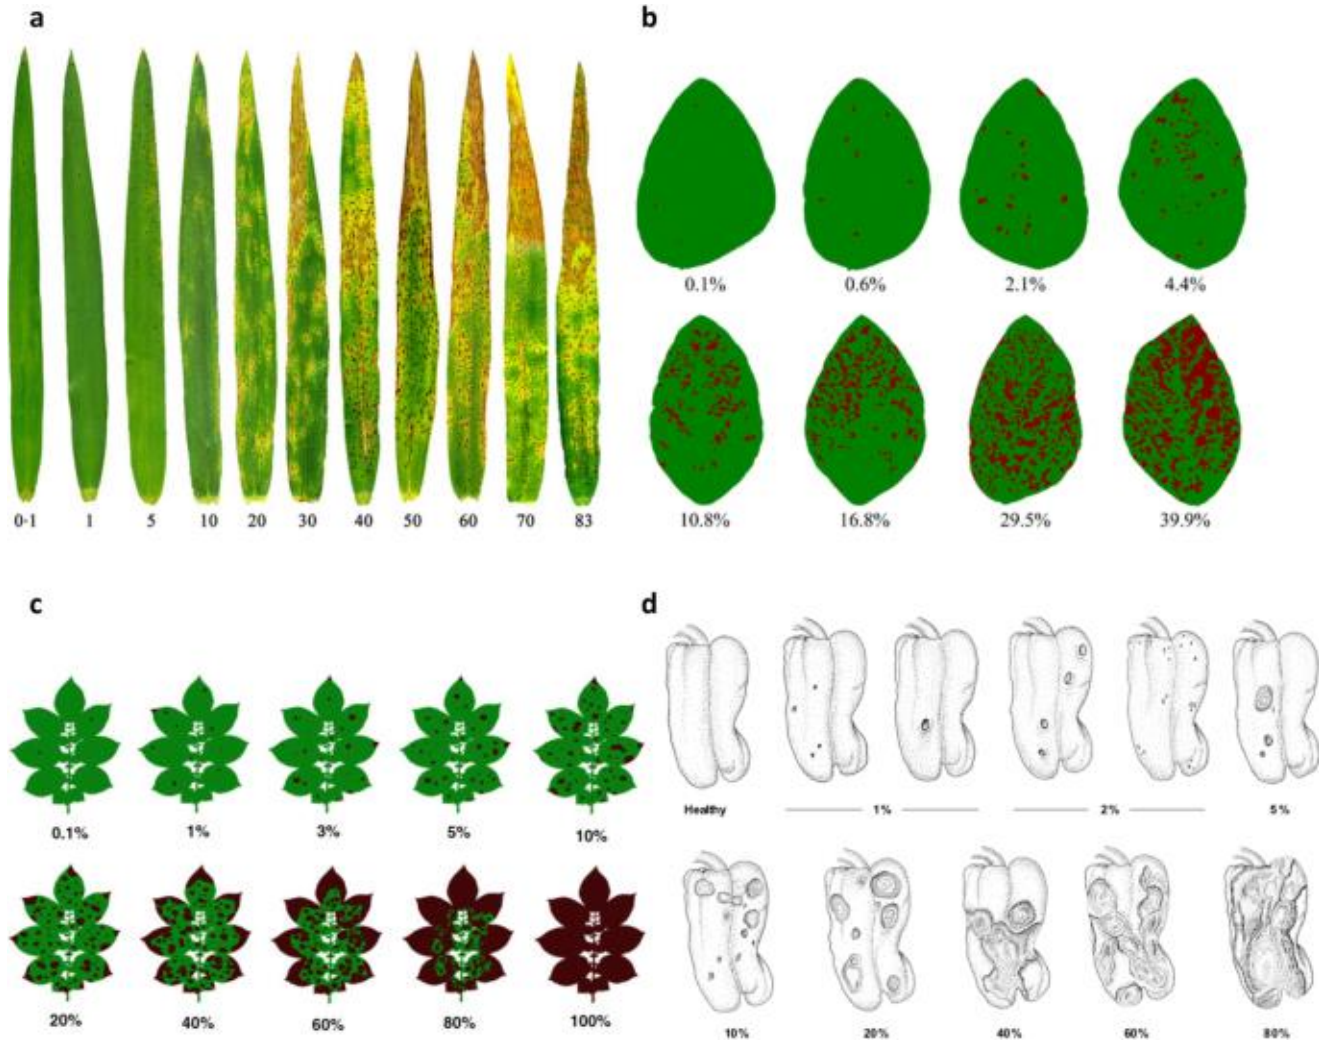

# ASSESSMENT OF FOLIAR FUNGAL DISEASES OF PLANTS

- **Learning objectives:**
  - ✓ Become familiar with methods used to measure disease intensity
  - ✓ Select the appropriate tool to assess foliar disease
  - ✓ Adapt an existing rating scale for disease assessment
  - ✓ Describe the weaknesses and strengths of using a specific rating scale
  - ✓ Explain the importance of disease assessment

# **ASSESSMENT OF FOLIAR FUNGAL DISEASES OF PLANTS**

## **What's the importance of measuring disease?**

**“Without quantification of disease, no studies in epidemiology, no assessment of crop losses, and no plant disease survey and their application would be possible”**

**Campbell and Neher, 1994**

Proper disease assessment helps us quantify how effective are specific treatments on controlling disease.

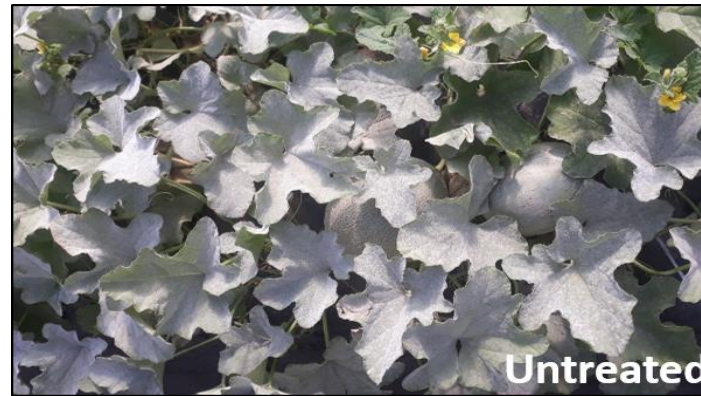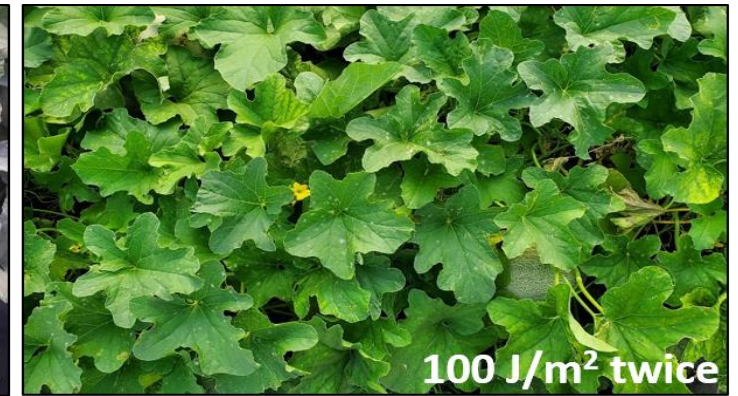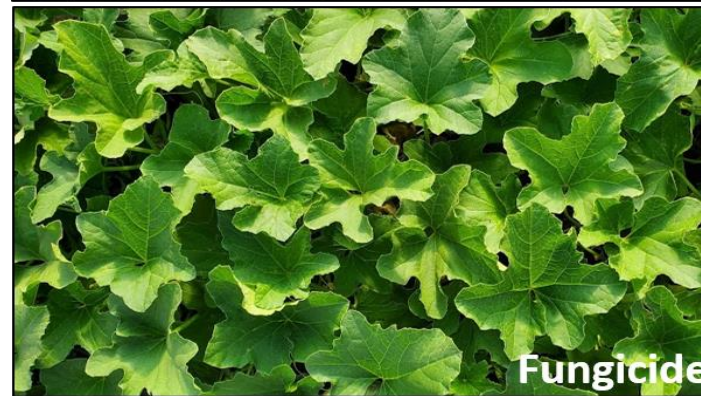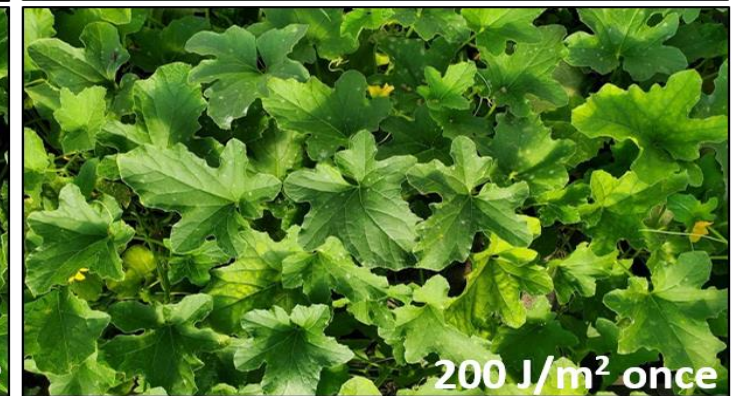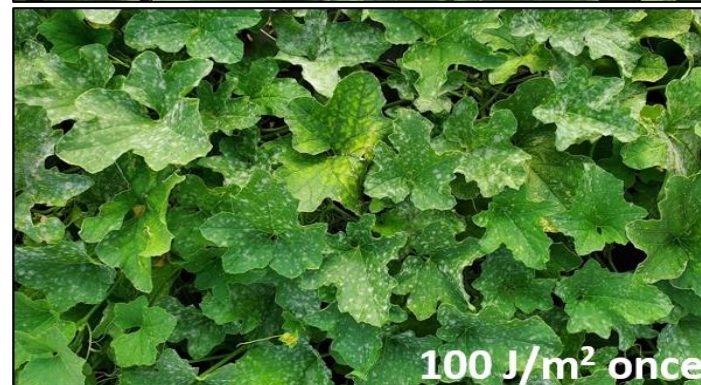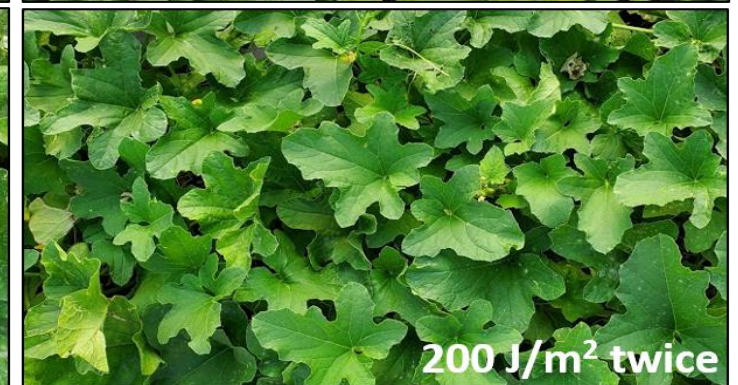

# DISEASE ASSESSMENT

- Measure of disease is essential to crop loss studies, disease prediction and development of disease management strategies.
- Assessment can be **quantitative** and **qualitative** or a combination of both.
- **Qualitative measurement** also known as categorical or discrete.
- **Quantitative measurement** is known as continuous.

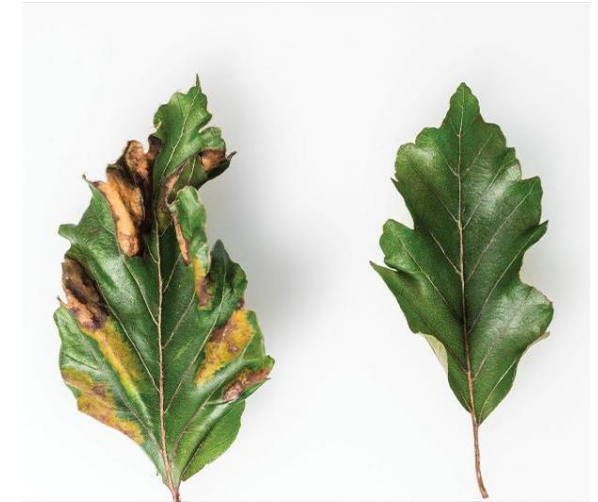

<https://mvmagazine.com/news/2022/11/13/whither-beech>

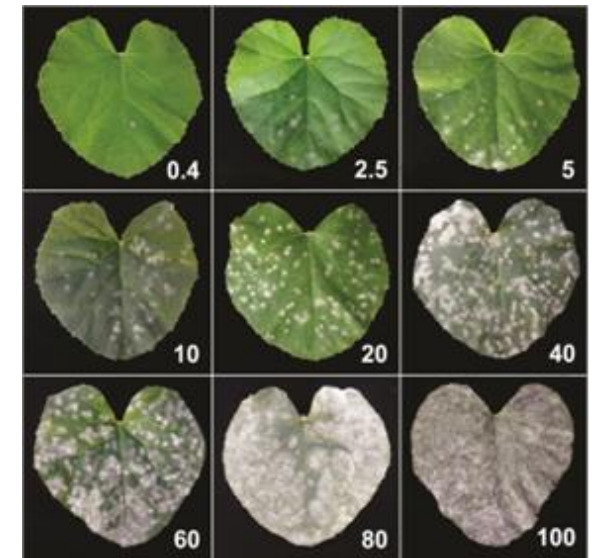

Lopes et al. 2023

# DISEASE INCIDENCE VS DISEASE SEVERITY

## Disease incidence

- Used to calculate proportion or number of diseased leaves
- It's a **discrete variable**
- Yes = Disease present
- No = Disease absent

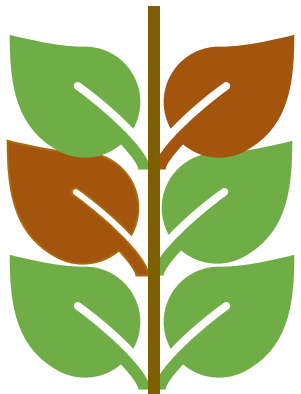

2 out of 6 =  
33.3% diseased

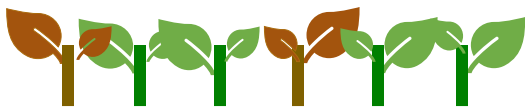

## Disease severity

- Area of the leaf infected by the disease
- Assessment of diseased area of a foliar fungal disease is a **continuous variable**

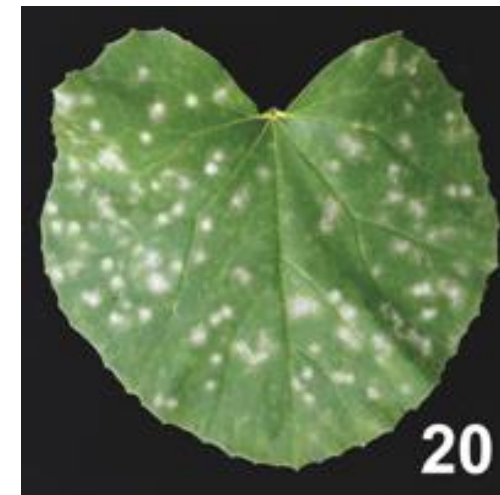

# DISEASE ASSESSMENT METHODS

It can be very difficult to measure disease severity of foliar fungal diseases

- **Direct estimation**
- **Direct estimation with the use of disease diagram**
- **Use of disease scales**
- **Use of ordinal rating scales**

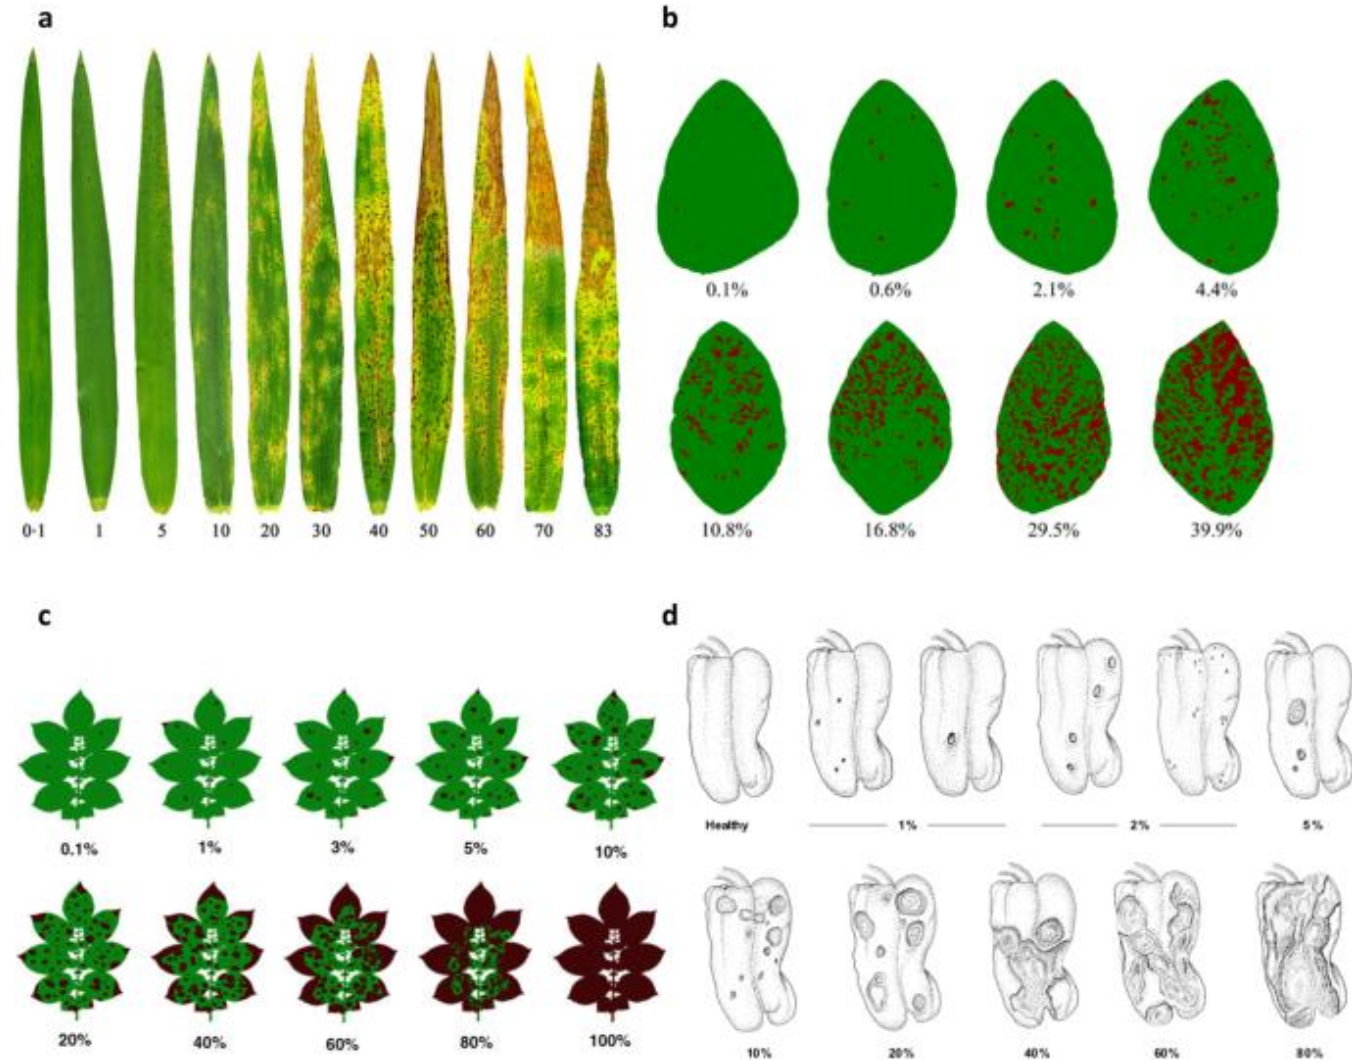

# DISEASE ASSESSMENT METHODS

➤ **Direct estimation:** without the help of diagrams or scales, rate the leaf and assign a disease severity value from 0 to 100% (0 to 1) according to the area affected.

\*You can only use one method to assess your foliar fungal disease

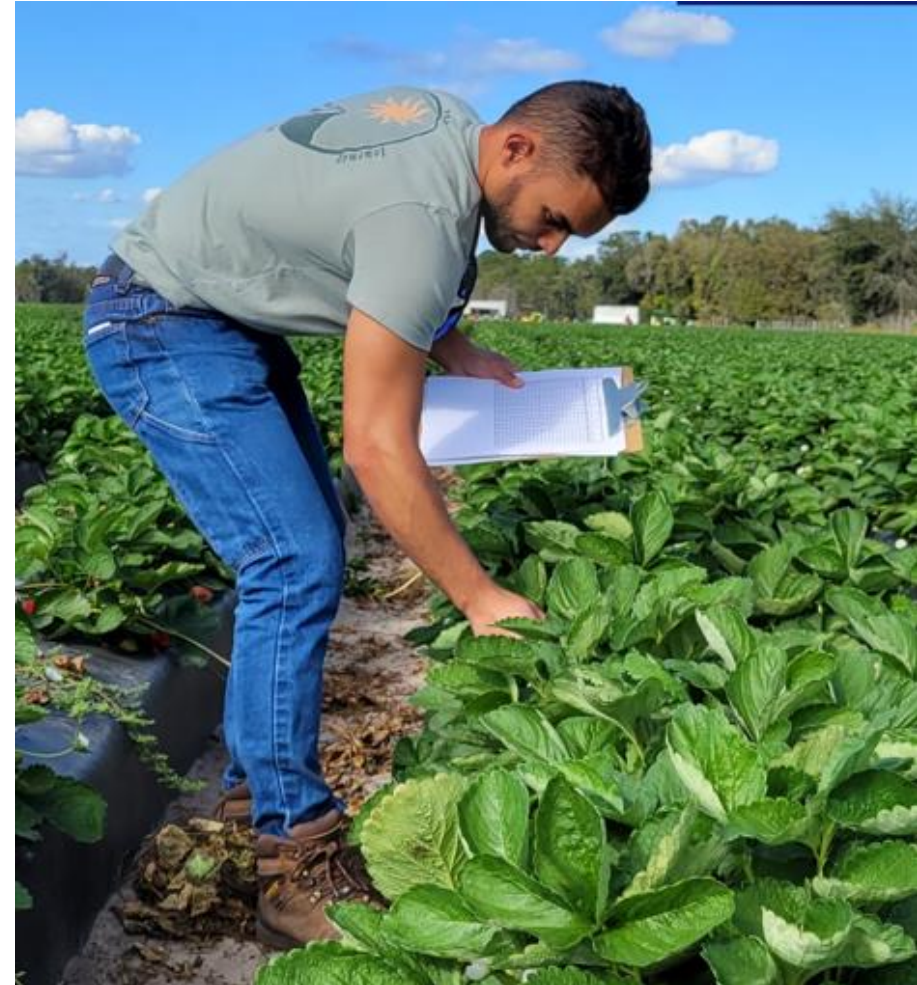

Credits: Eva Mulandesa



# DISEASE ASSESSMENT METHODS

## ➤ Direct estimation with the use of disease diagram

- Graphic representing selected classes of disease severity
- Also called standard area diagrams

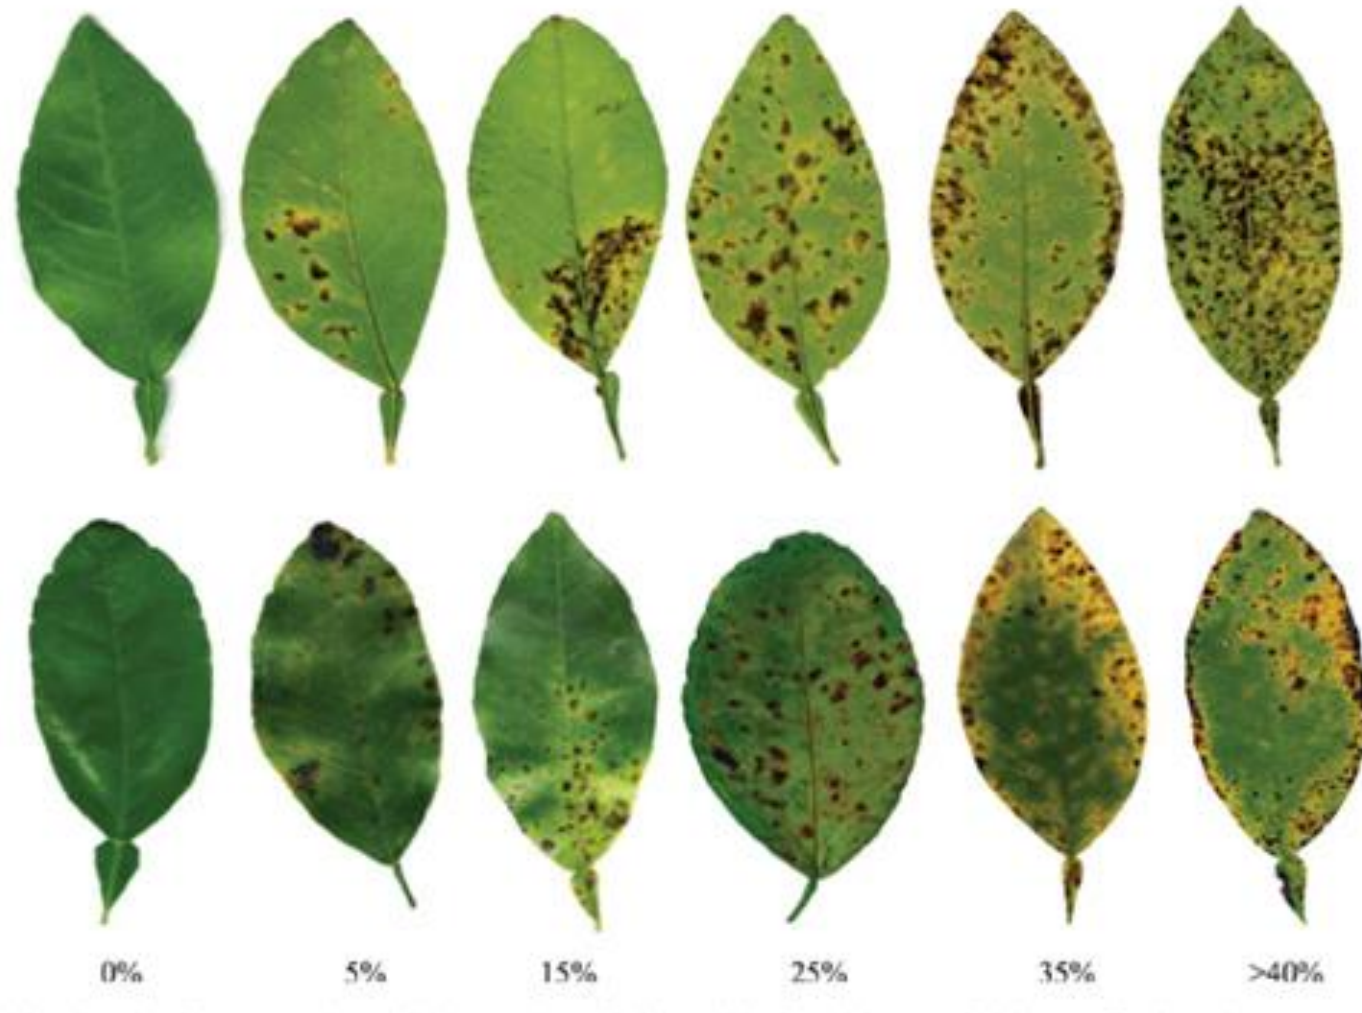

# DISEASE ASSESSMENT METHODS

- **Use of disease scales:** The disease scale is separation of the continuous severity values from 0 to 100% into a finite number of classes.

## Class Severity range

|   |                |
|---|----------------|
| 0 | 0              |
| 1 | 0+ up to 25%   |
| 2 | 25+ up to 50%  |
| 3 | 50+ up to 75%  |
| 4 | 75+ up to 100% |

# DISEASE ASSESSMENT METHODS

➤ **Use of ordinal rating scales:** observe a foliar fungal disease and assign one of the fixed number of labeled severity rating classes:

0= none

1= slight infection

2=slight to moderate infection

3= moderate infection

4= moderate to severe infection:  
some dead leaves + all leaves with at least one spot

5 = severe infection: dead leaves + all leaves of several spots

6 = dead

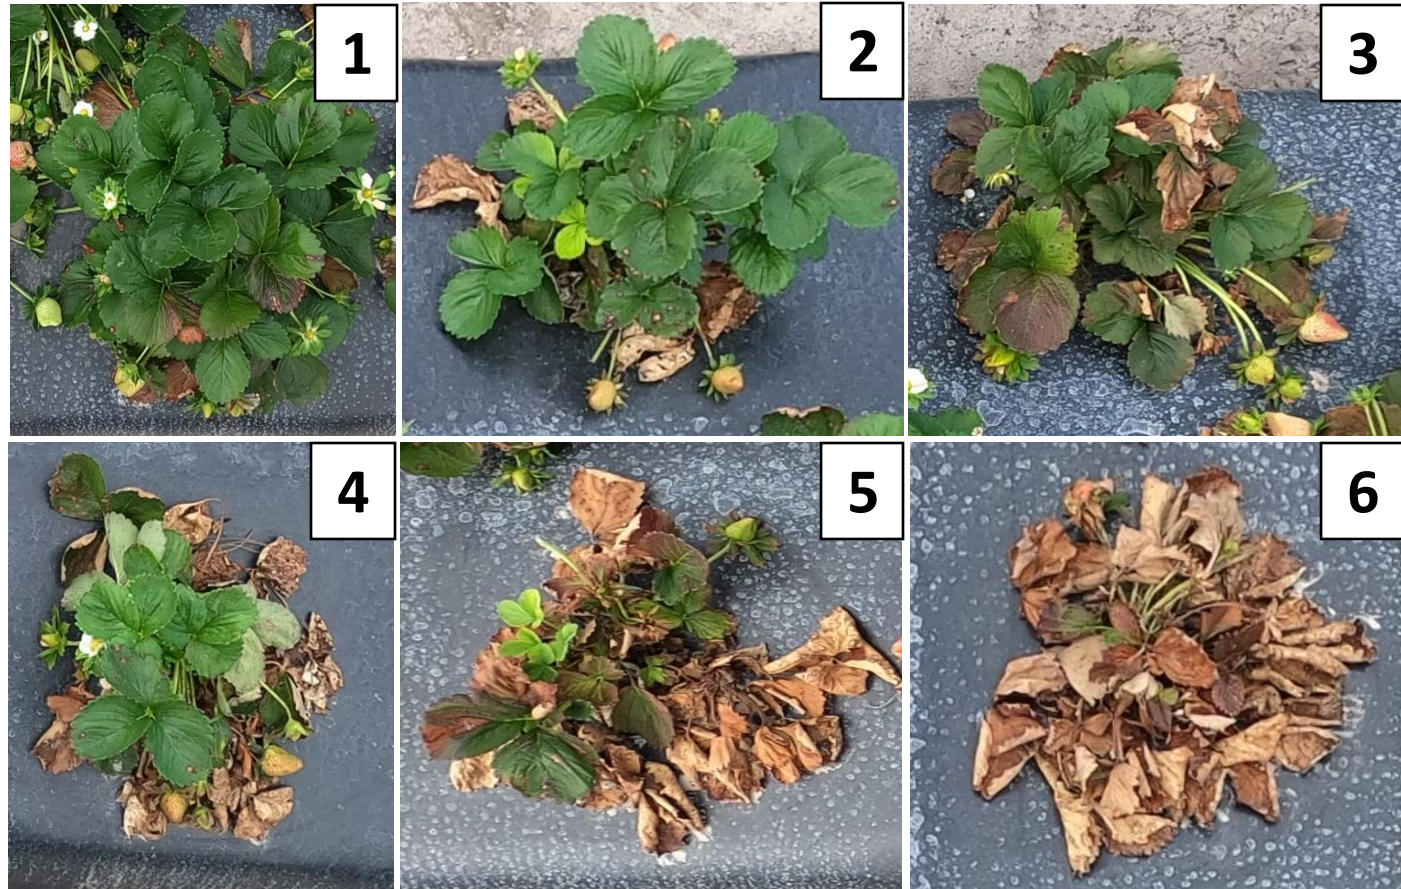

Credits: Juliana Baggio

\*This is a popular approach due to the difficulties in the process of evaluating certain types of disease. But it can be tricky during the data analysis

# Challenges of disease rating

- Where is the edge of this spot?
- Where do symptoms start and end?

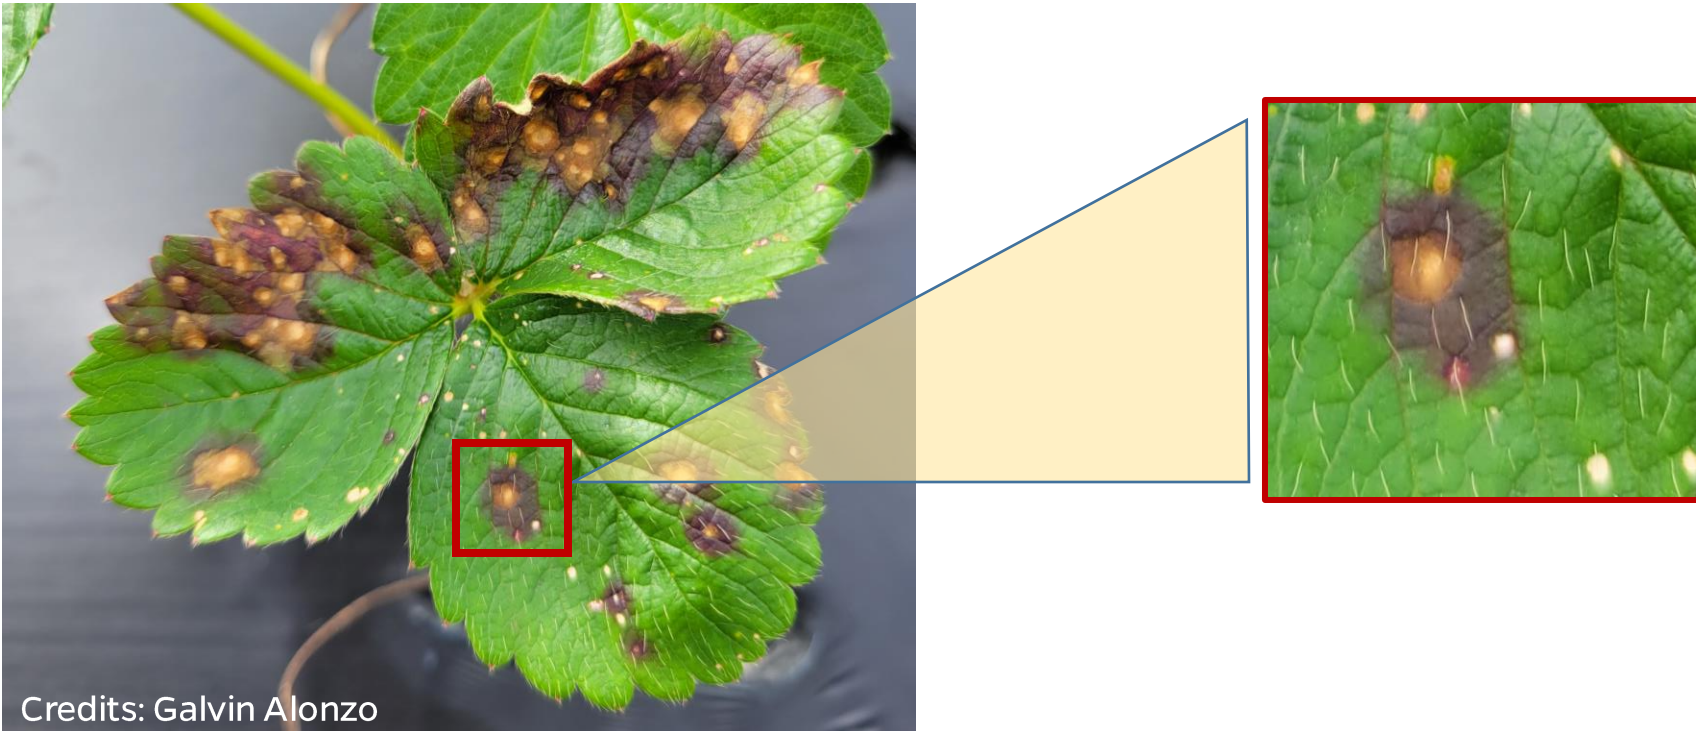

# Challenges of disease rating

Which shade of green is symptomatic?

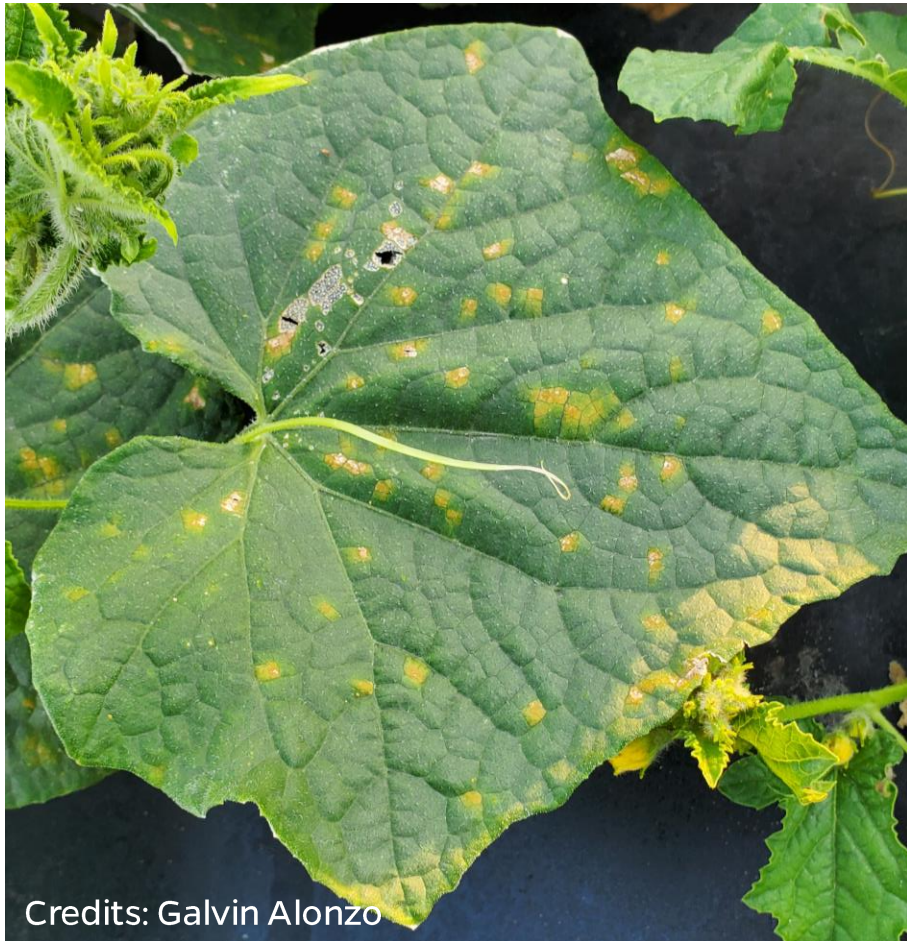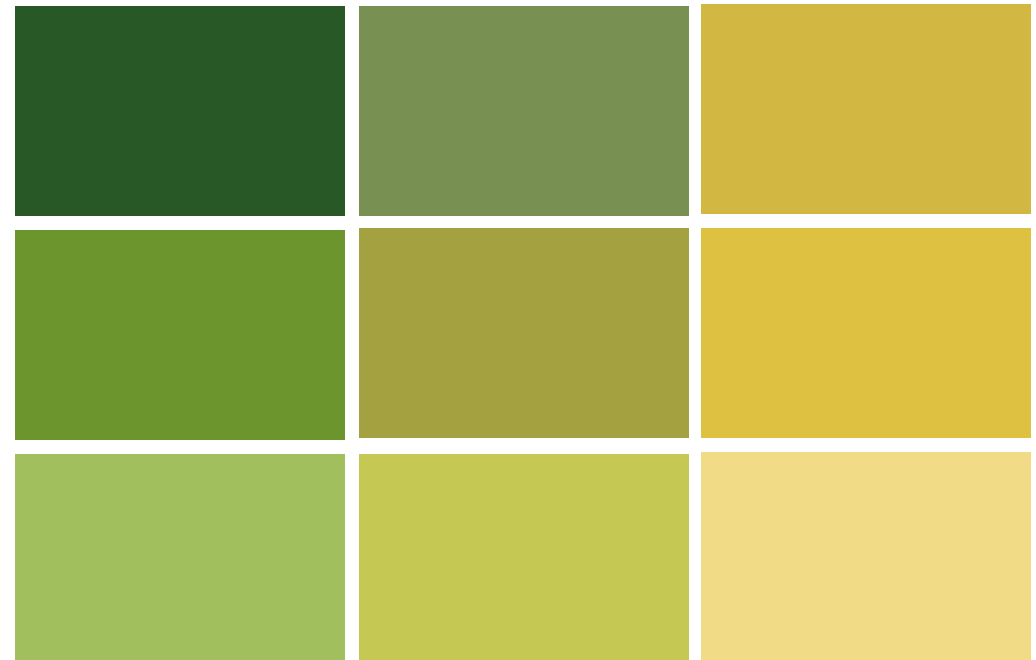

# Challenges of disease rating

Do you have proper lighting during evaluation?

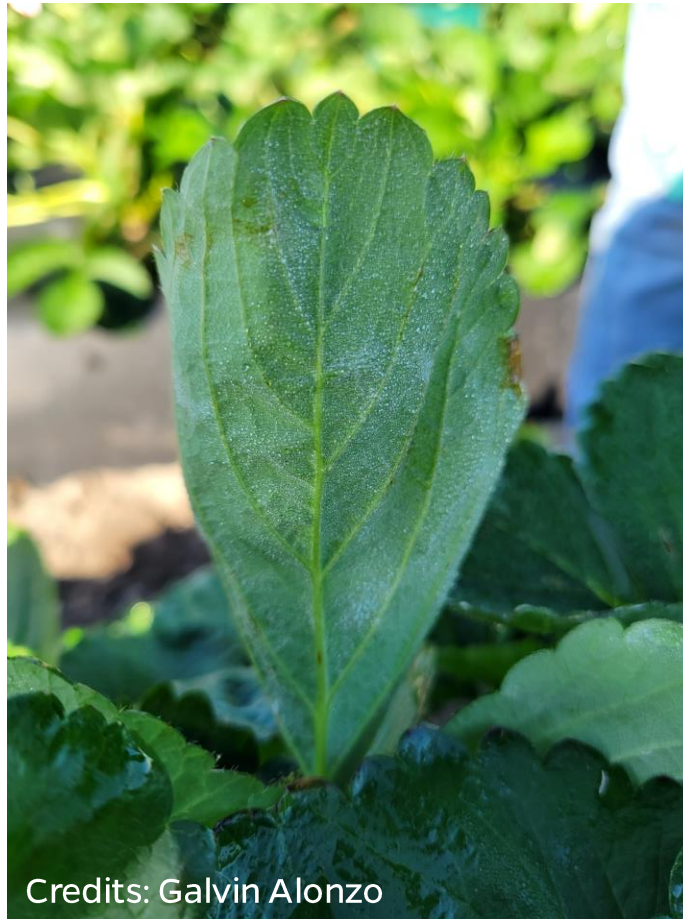

Credits: Galvin Alonzo

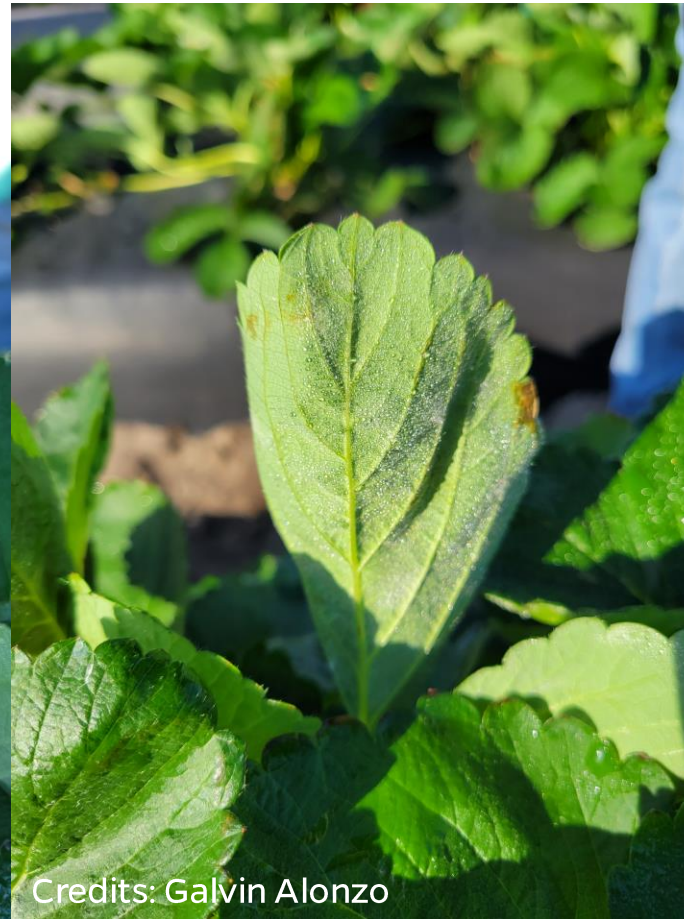

Credits: Galvin Alonzo

# Challenges of disease rating

Similar symptoms for different diseases.

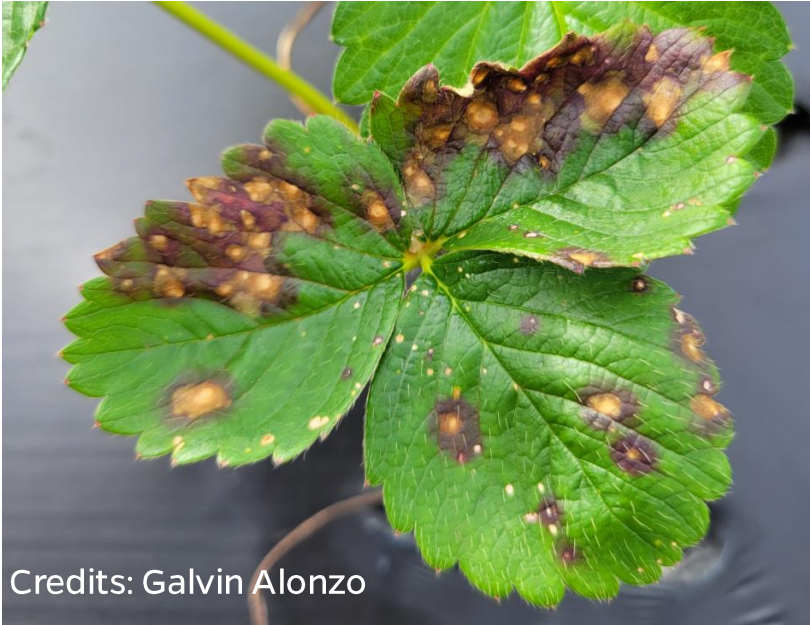

Leaf blotch of strawberry caused by  
*Gnomonia comari*

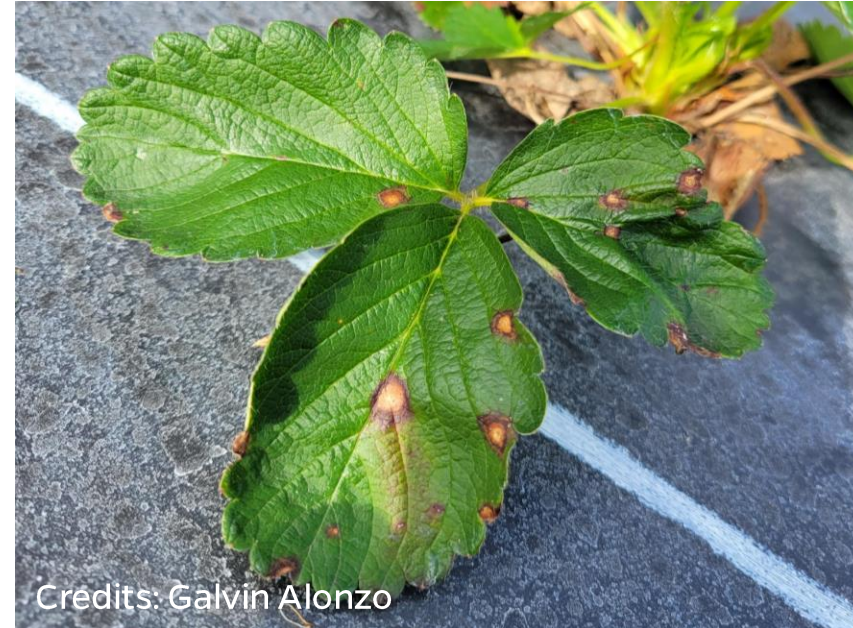

Leaf spot of strawberry caused by  
*Neopestalotiopsis* sp.

# Challenges of disease rating

- Variability between raters
- Evidence after taking the quiz

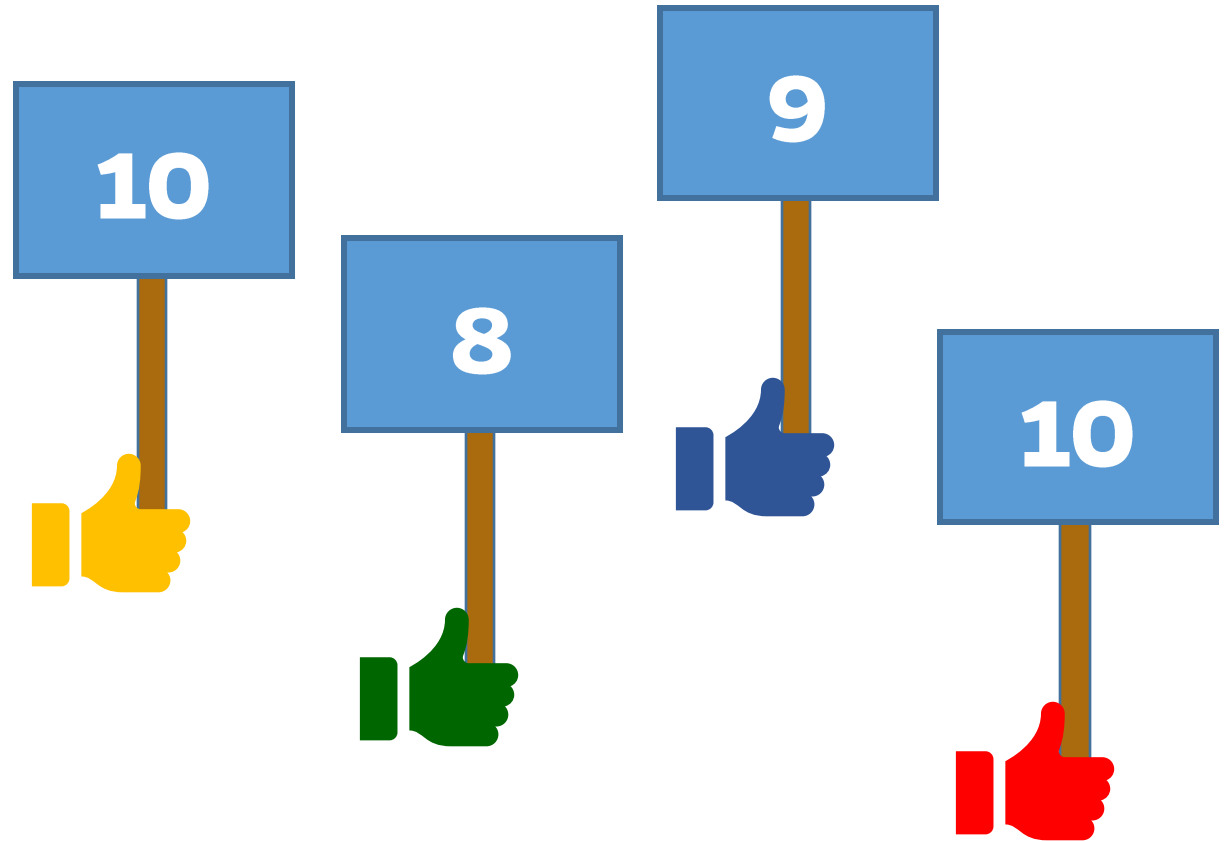



# NON-GRADED QUIZ

You're going to rate disease severity from 0 to 100% diseased area

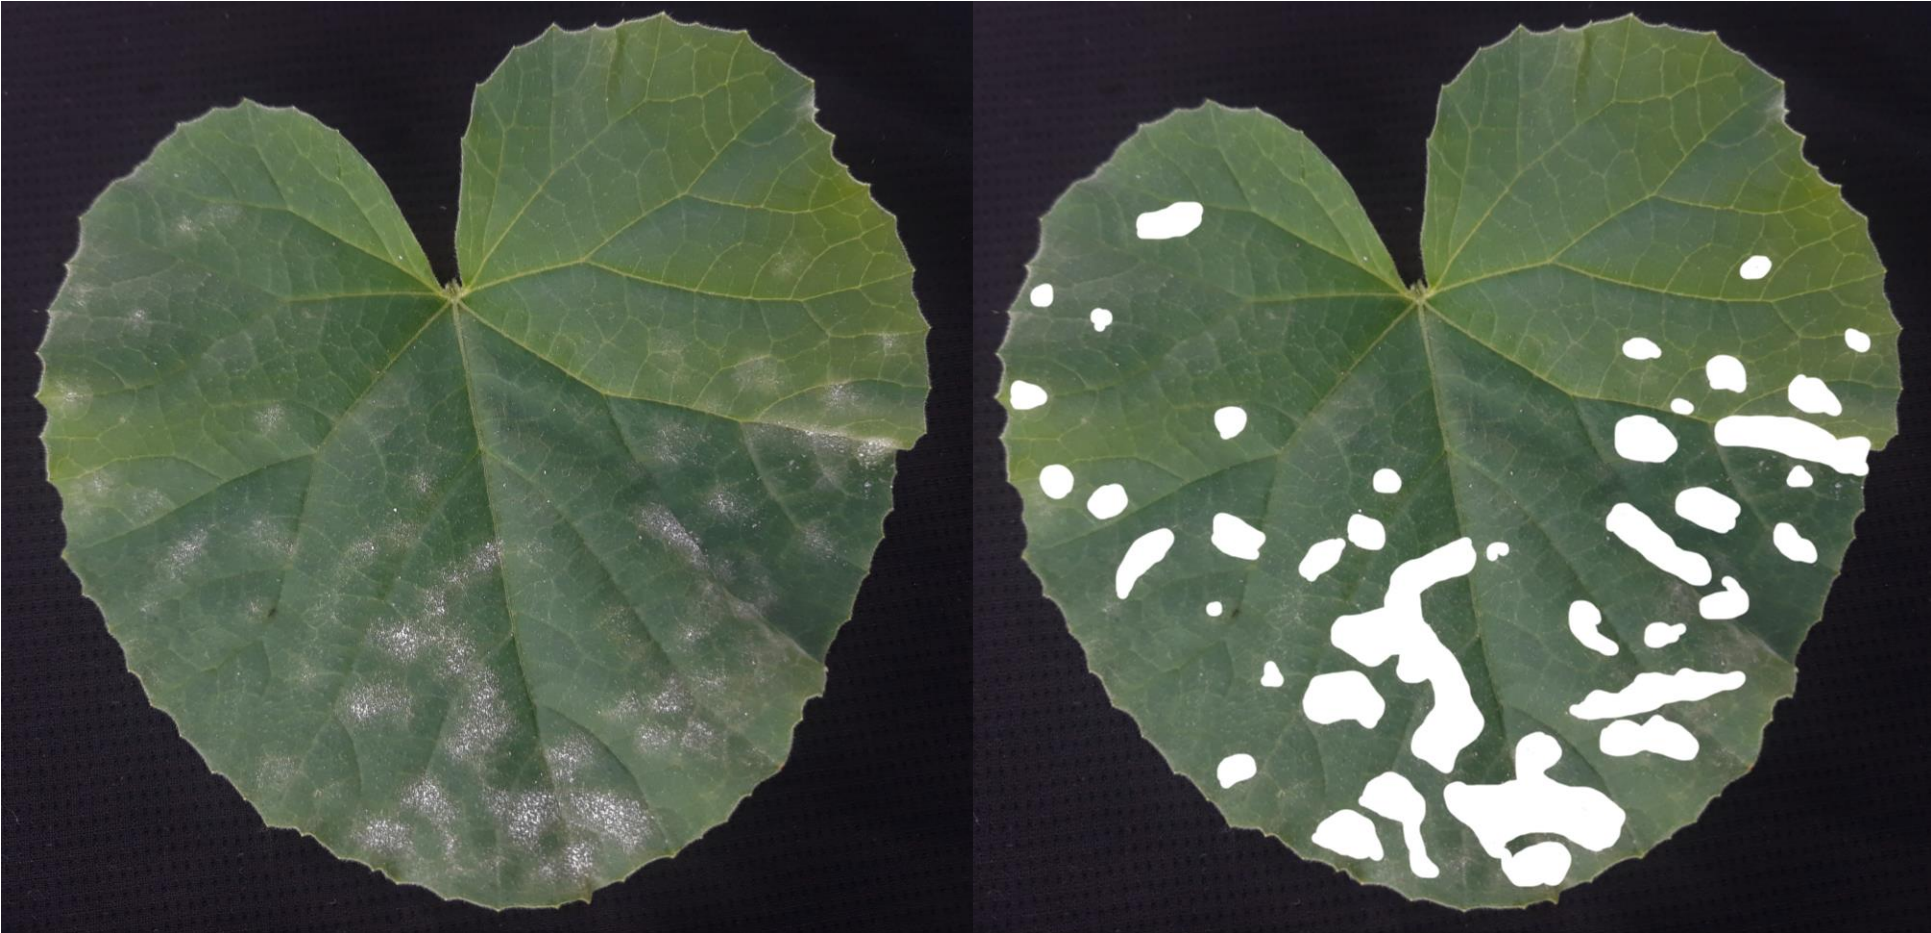

**Real signs of powdery mildew**

**White colored area = Area with disease**

**You're going to rate disease severity from 0 to 100% diseased area**

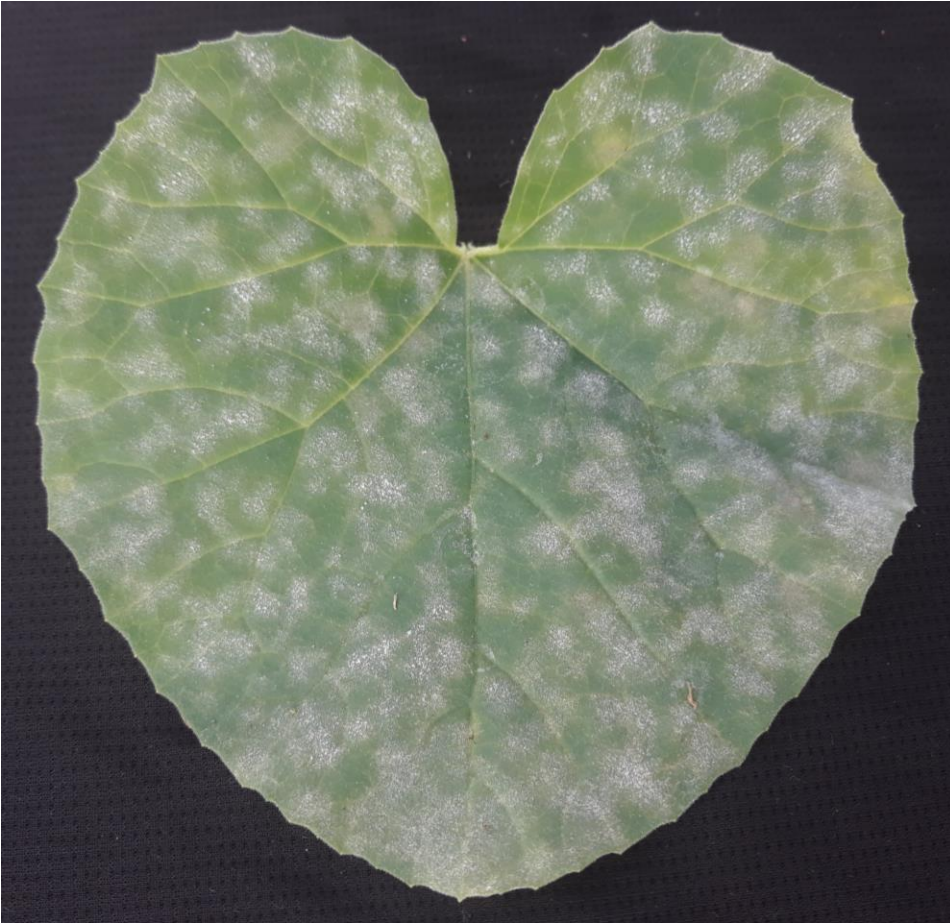

**Real signs of powdery mildew**

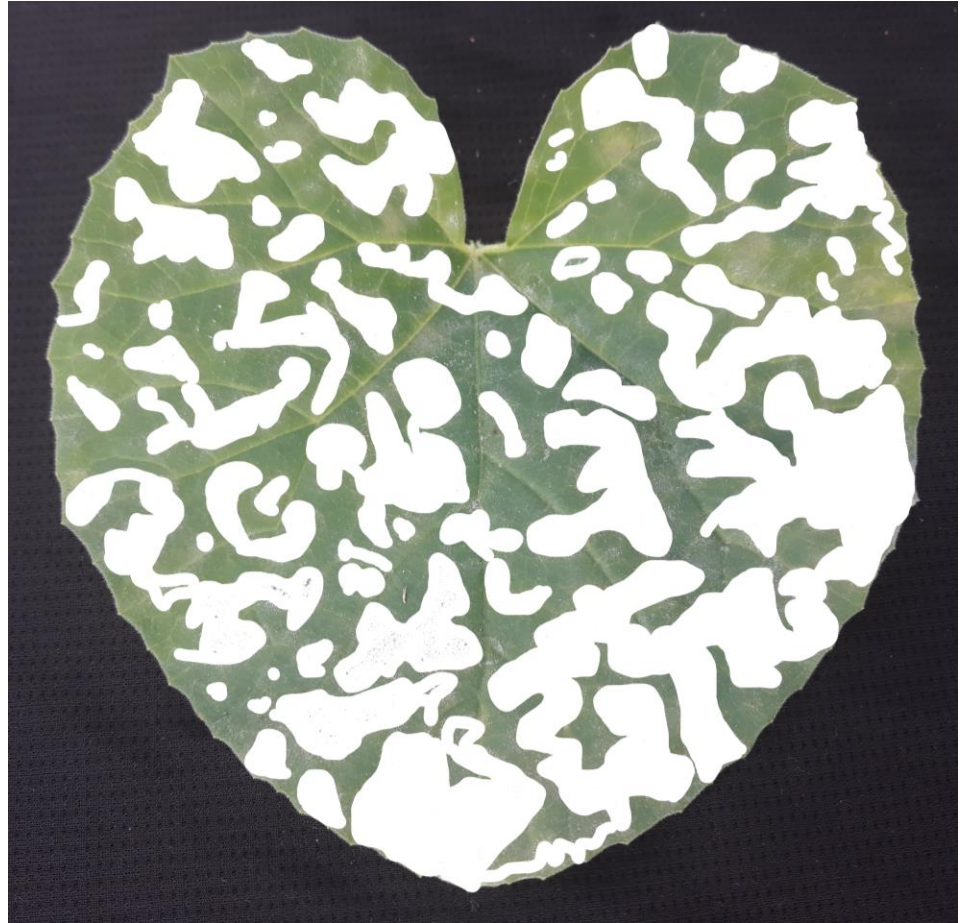

**White colored area = Area with disease**

# Scan QR code to open answer form

**You'll have 12  
seconds to  
rate each leaf**

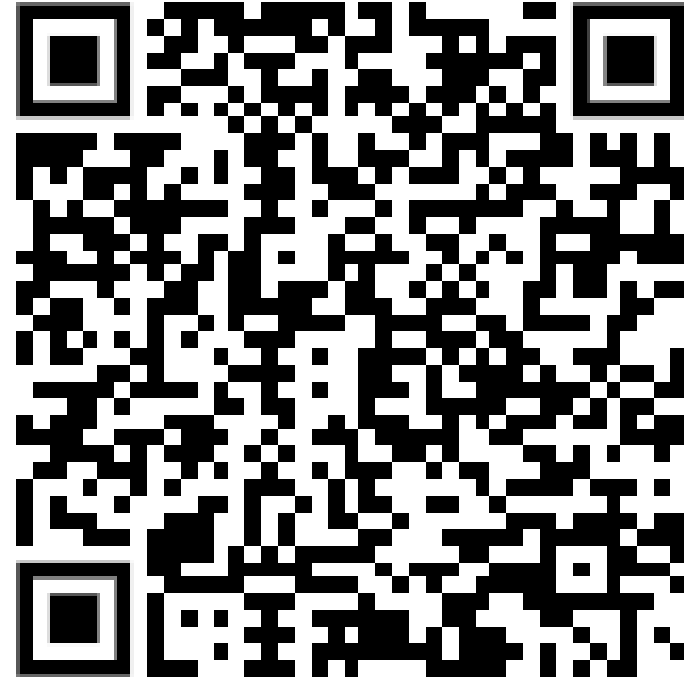

[https://docs.google.com/forms/d/e/1FAIpQLSfZ4xJ8TEtA1gvQ4-bTE7nusJV883FUF4TRgxzgrToCcZ4-Q/viewform?usp=sf\\_link](https://docs.google.com/forms/d/e/1FAIpQLSfZ4xJ8TEtA1gvQ4-bTE7nusJV883FUF4TRgxzgrToCcZ4-Q/viewform?usp=sf_link)

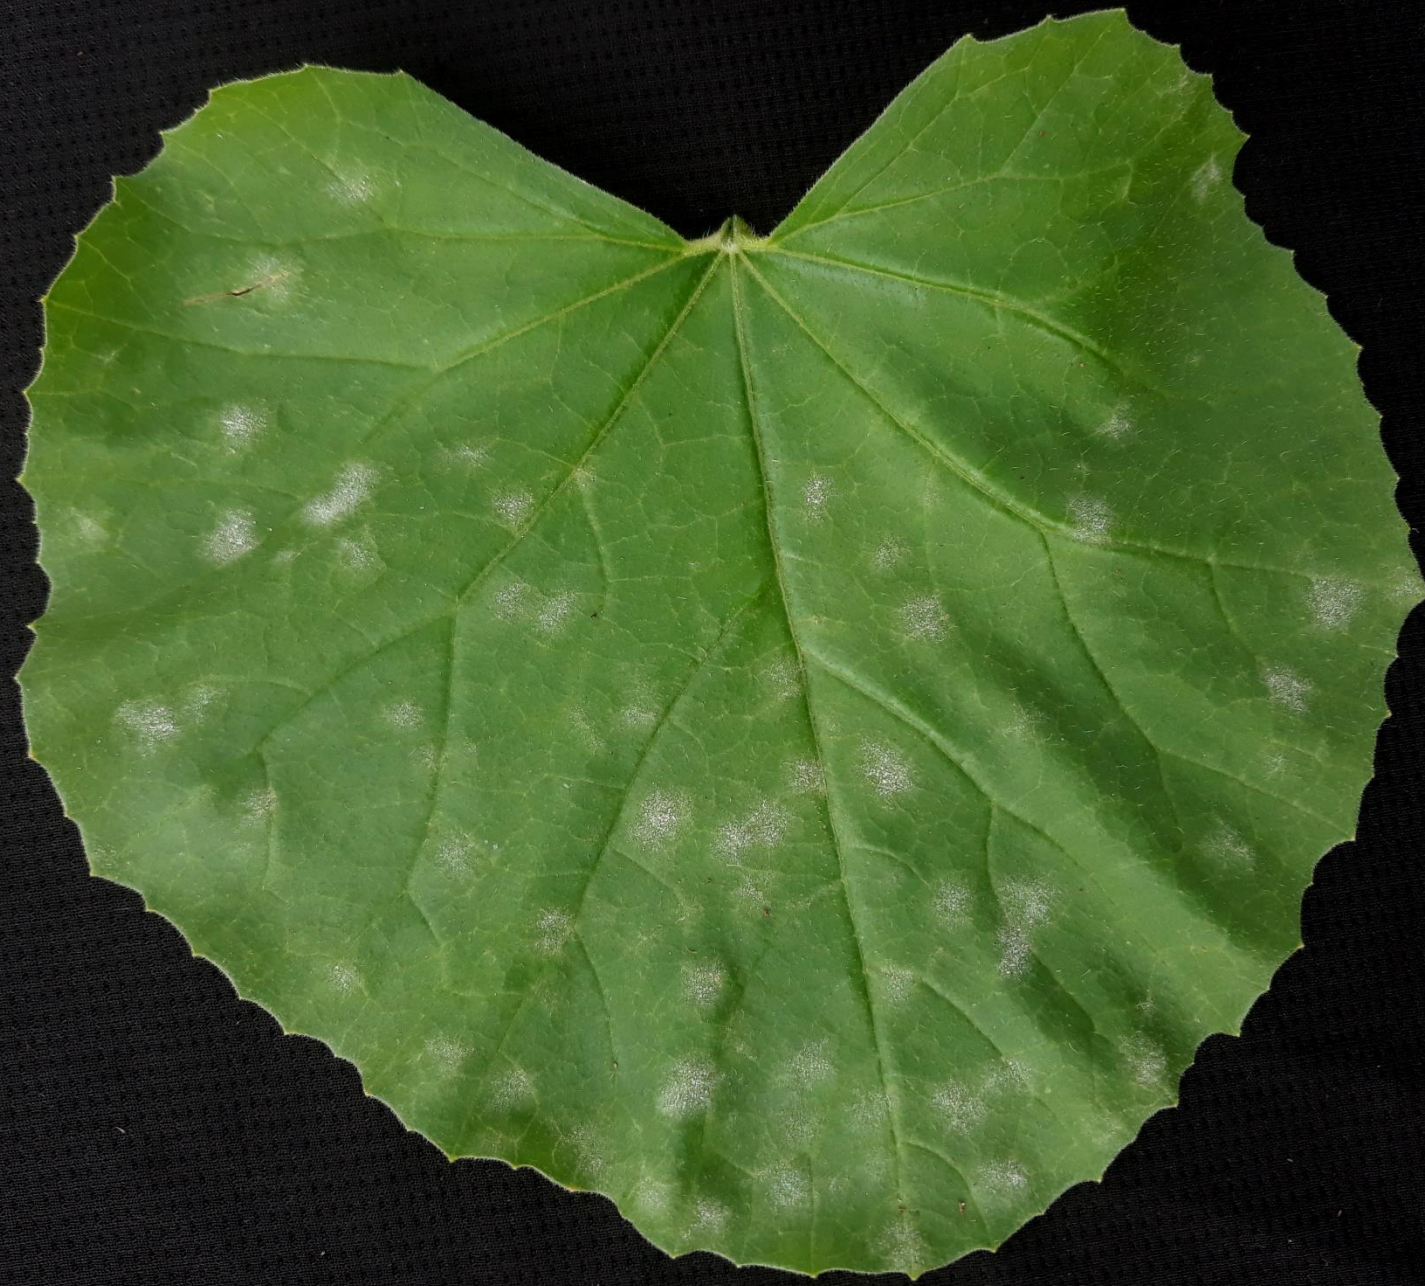

1

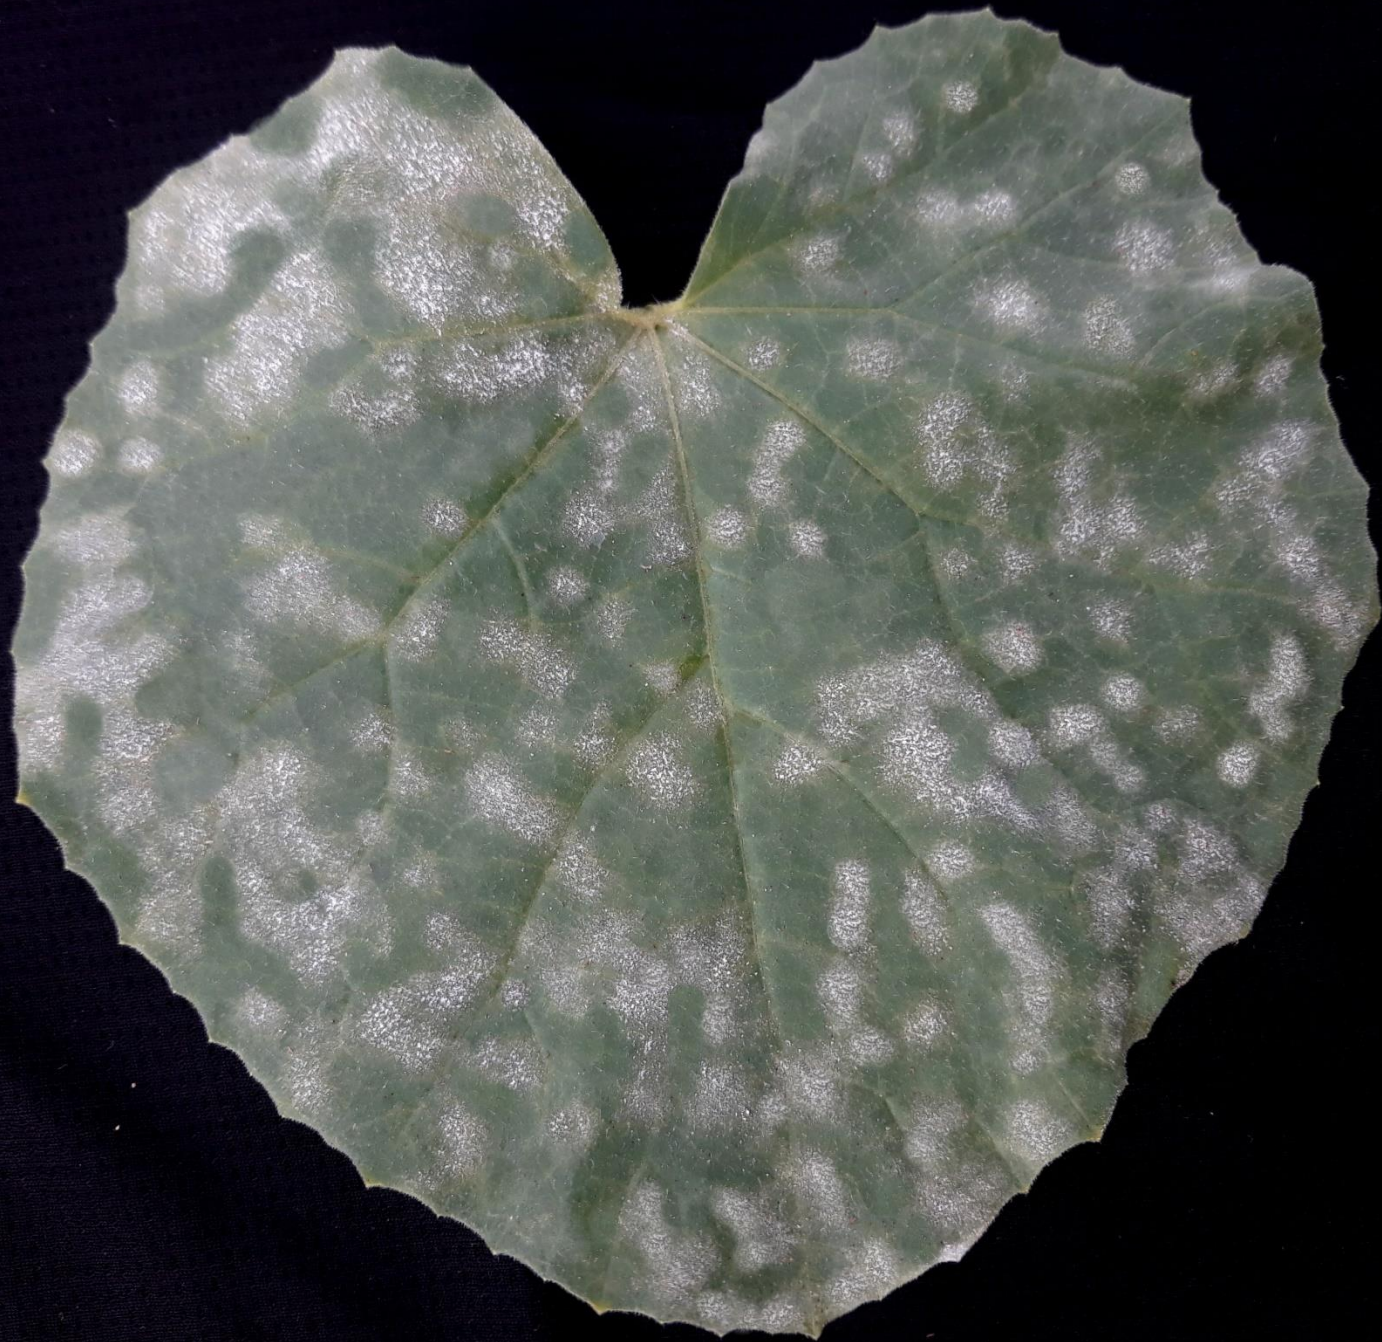

2

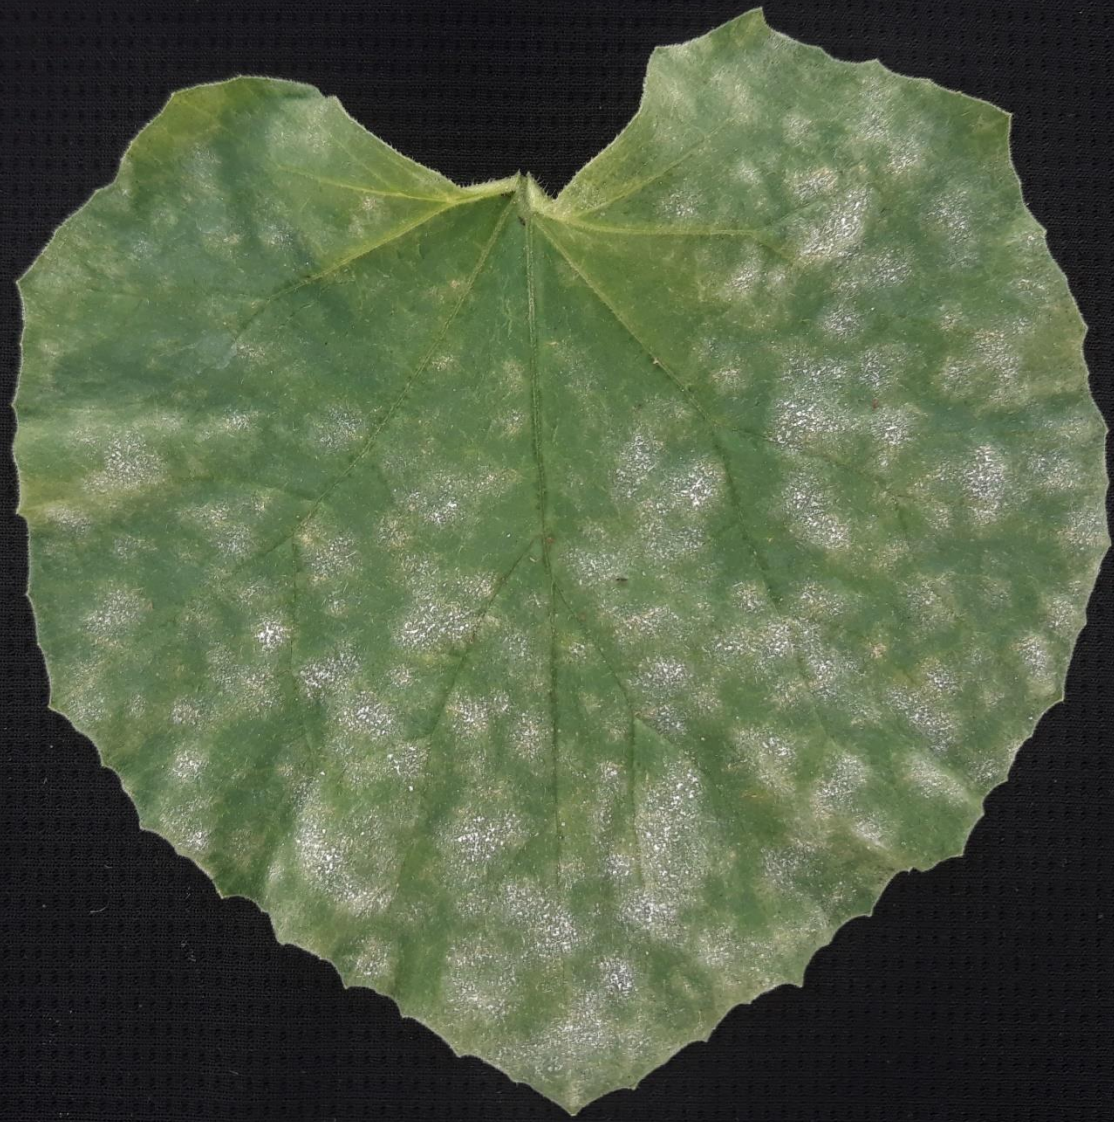

3

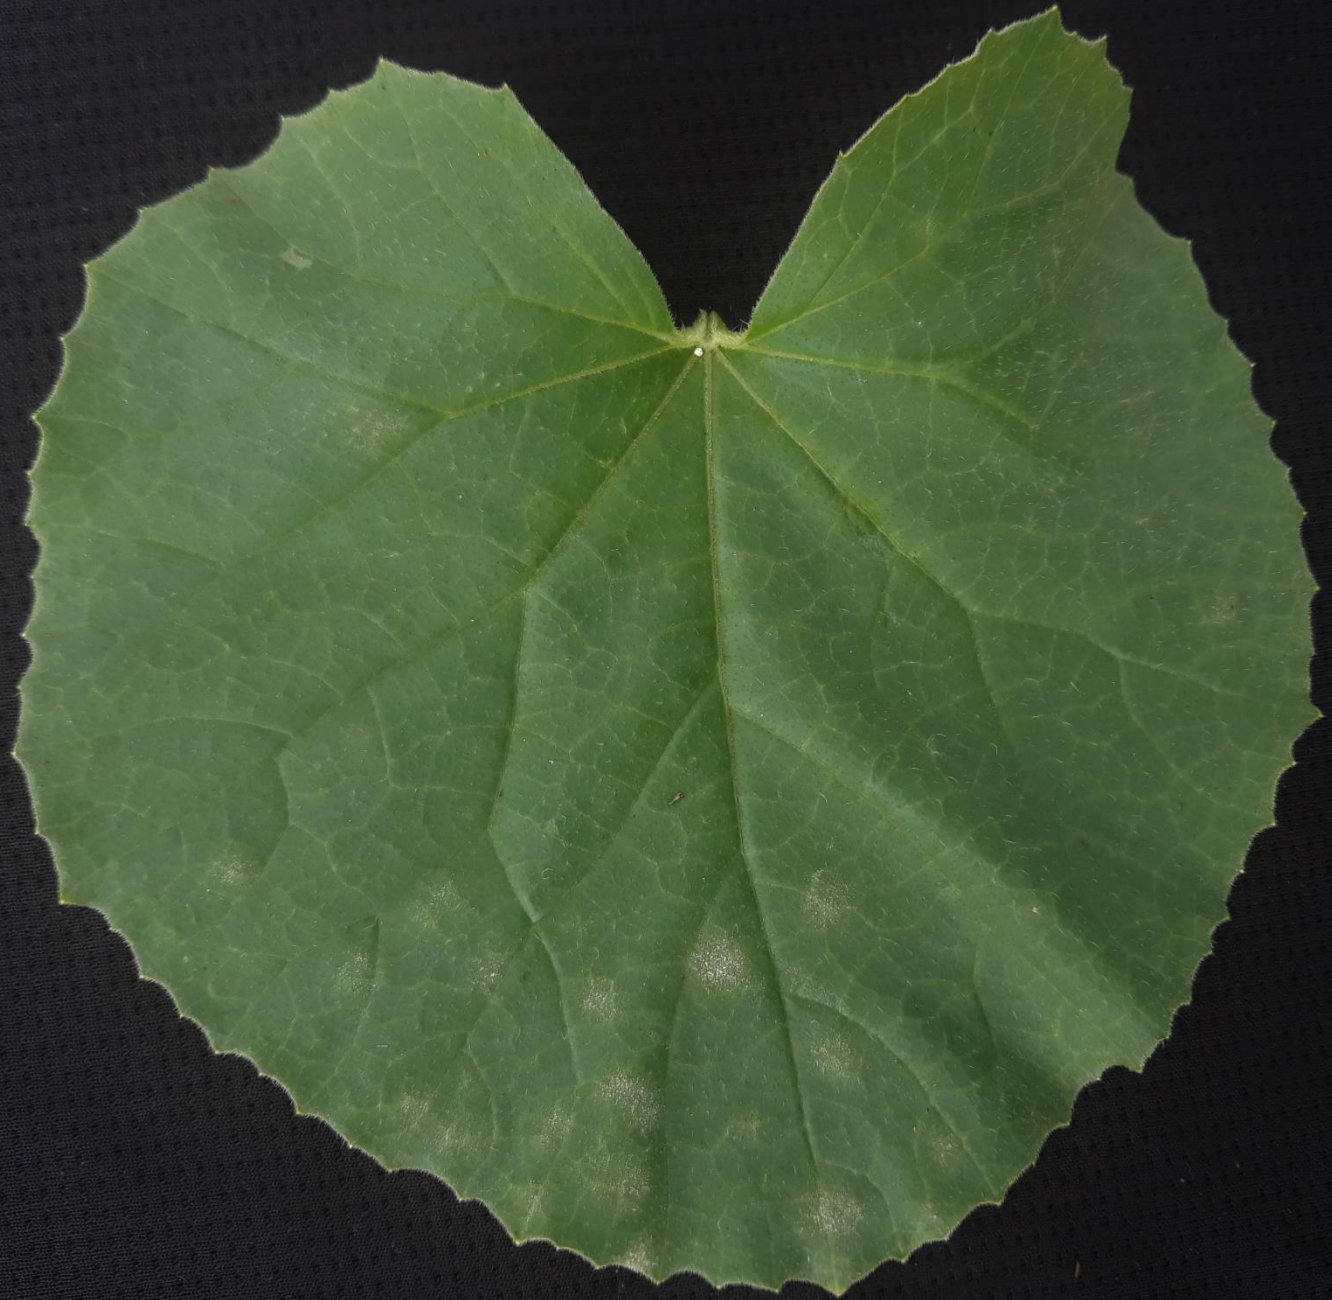

4

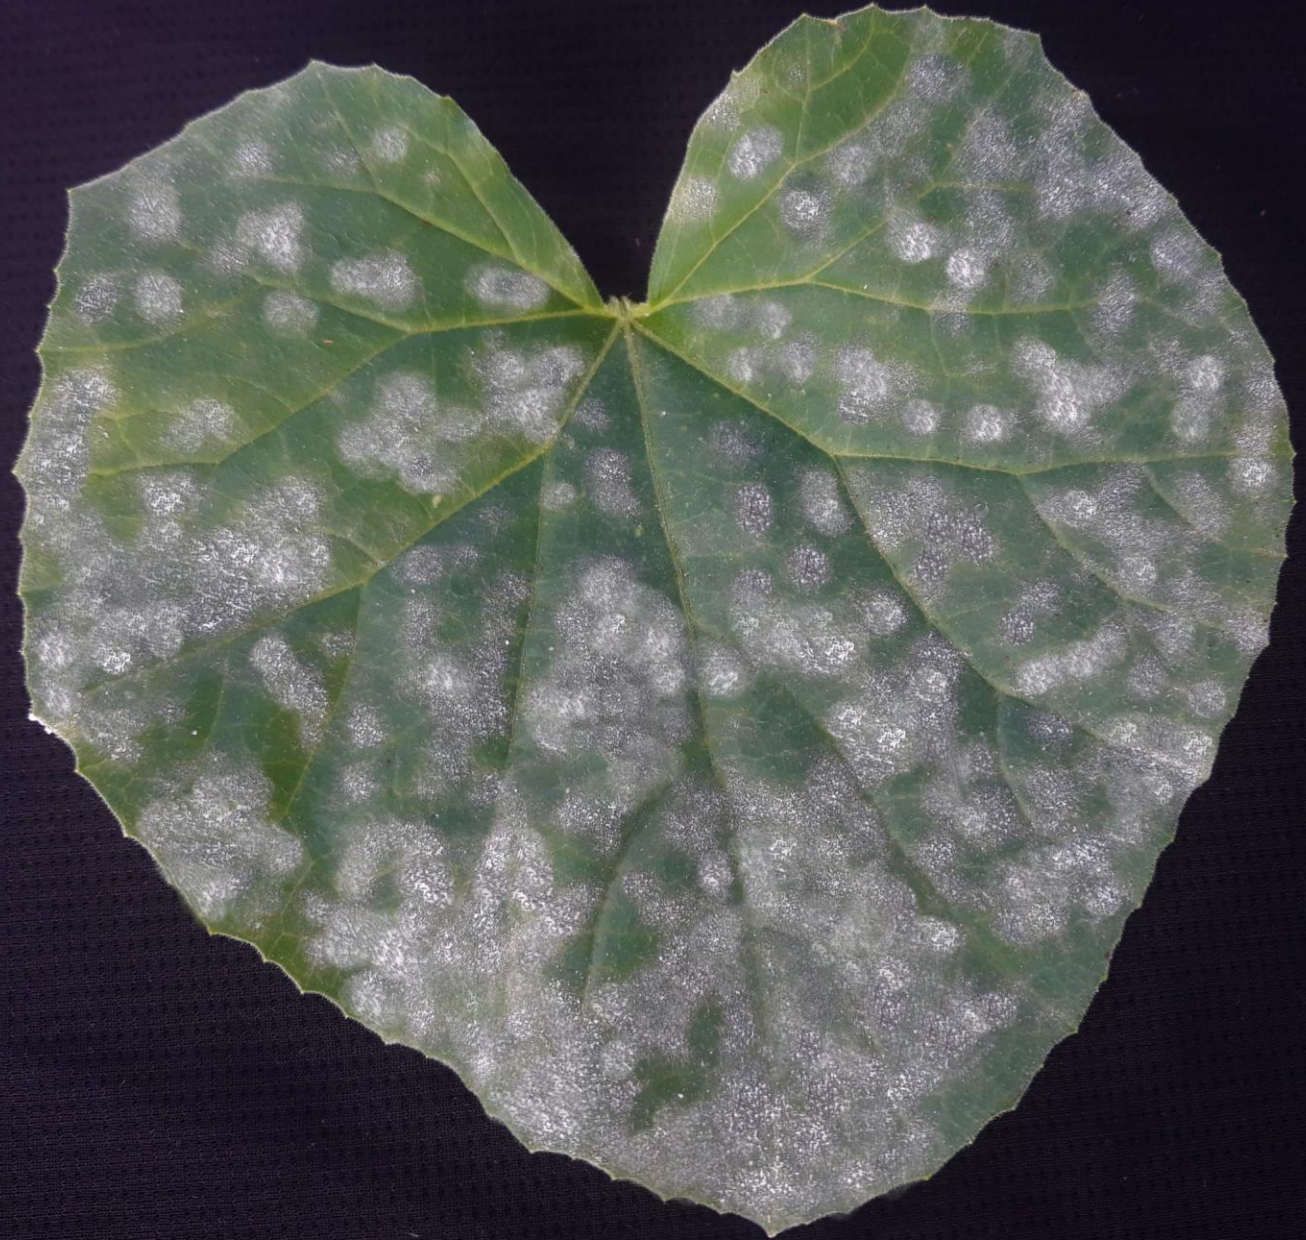

5



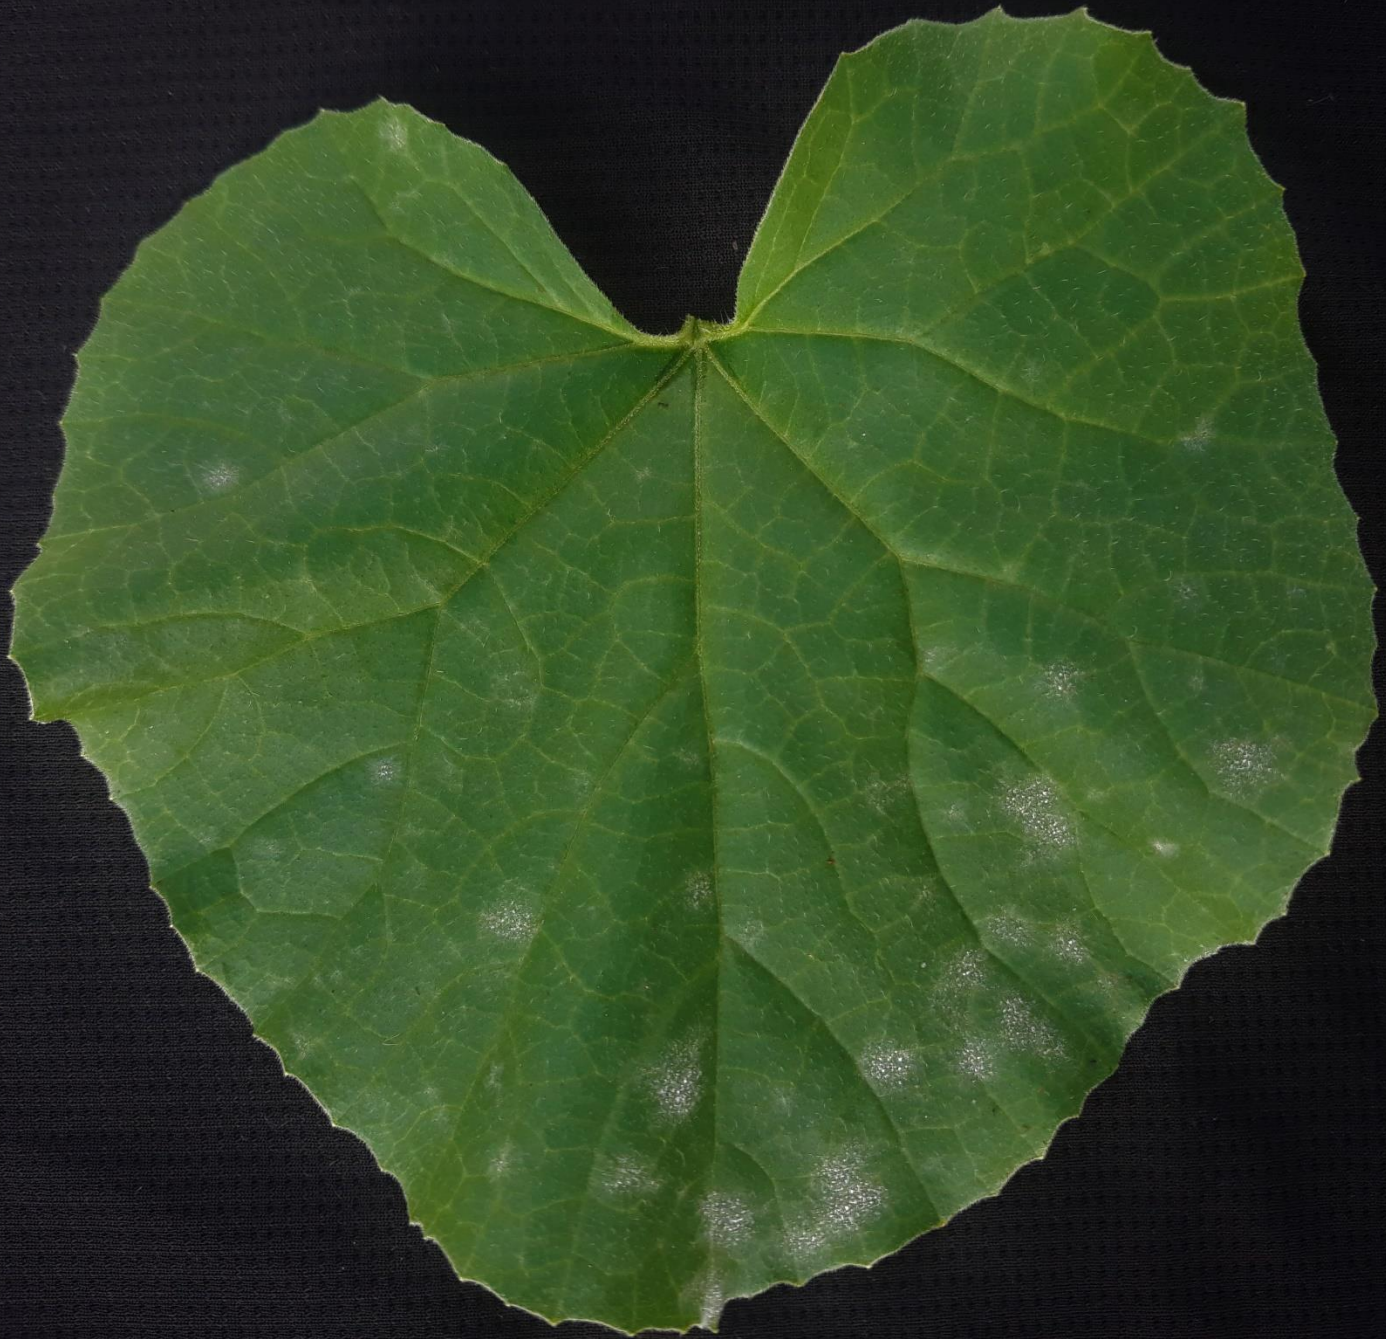

6

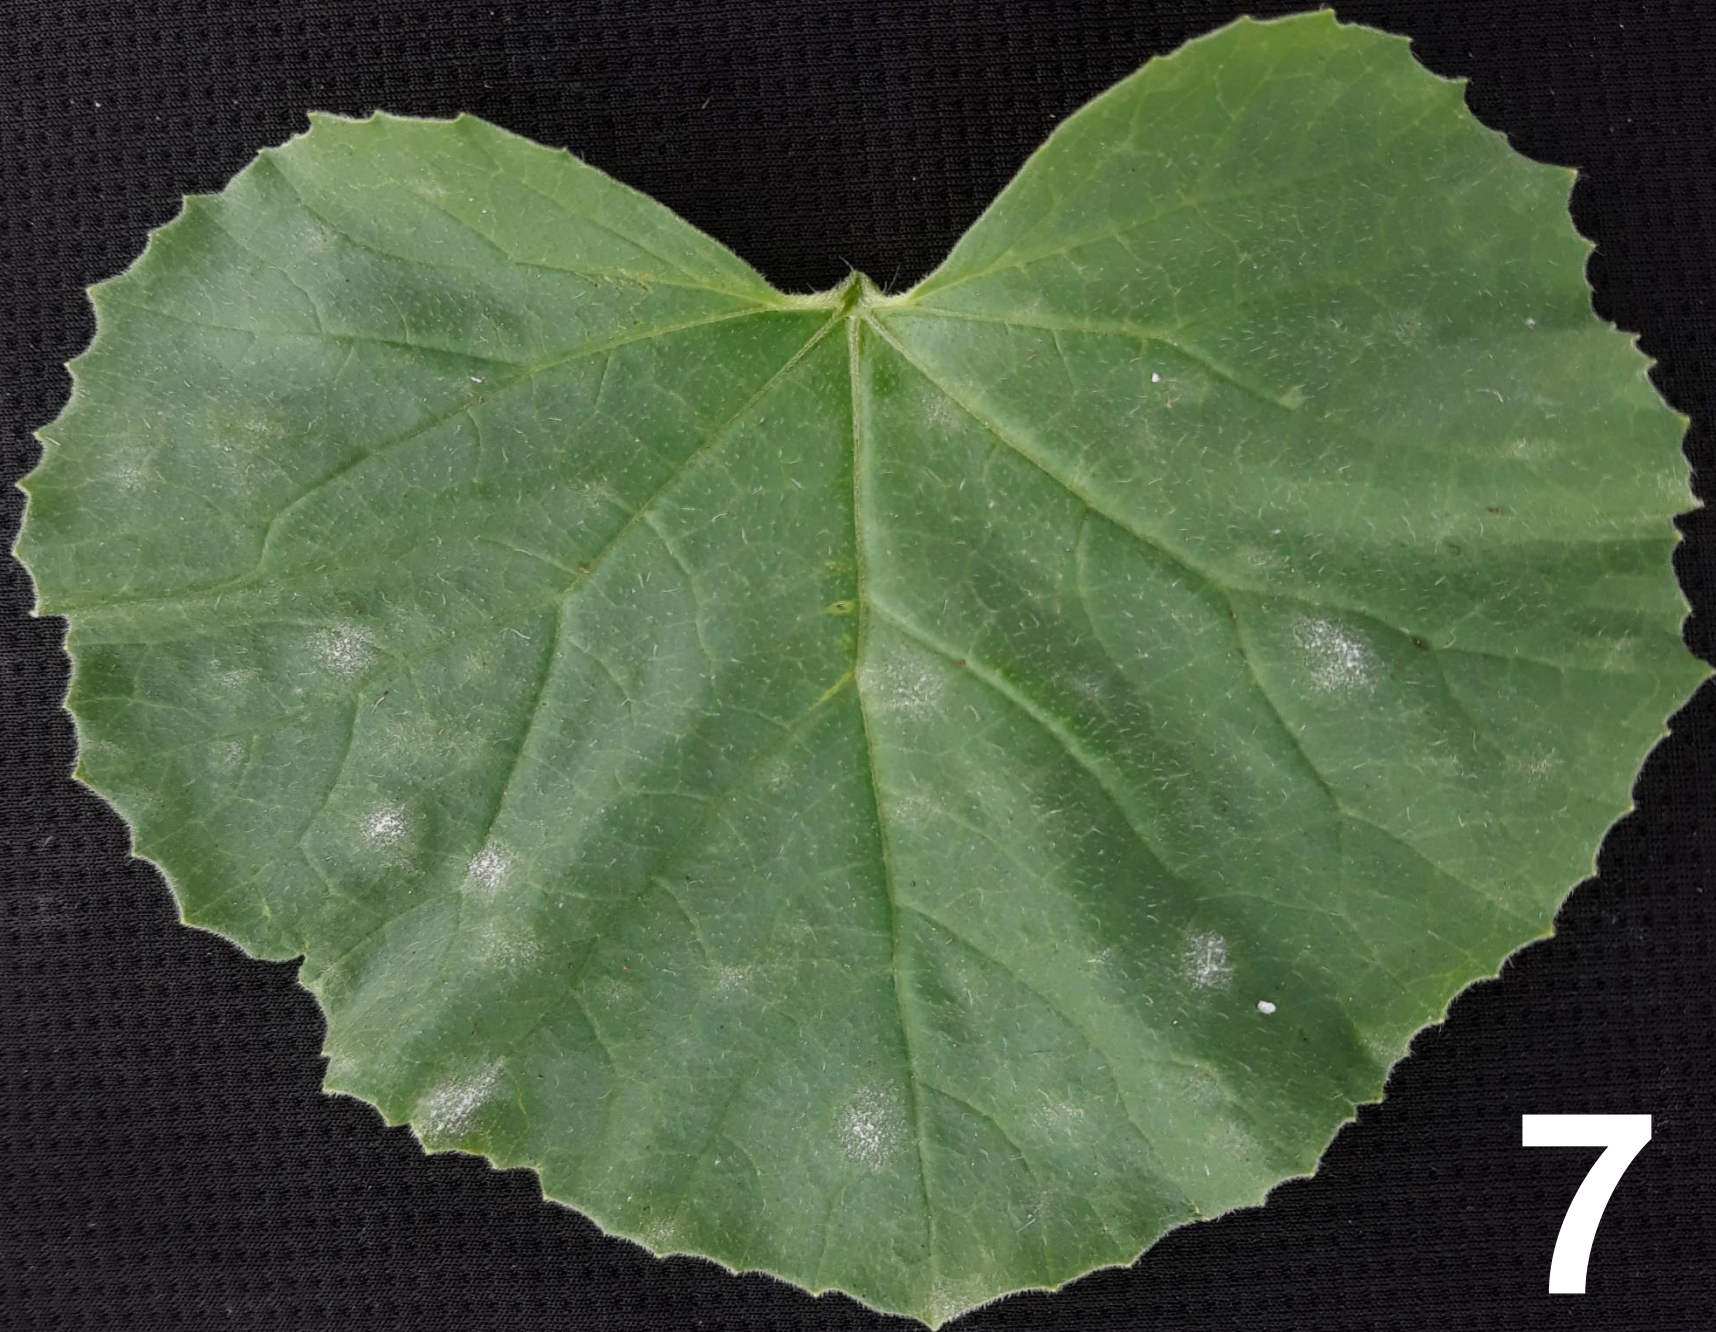

7

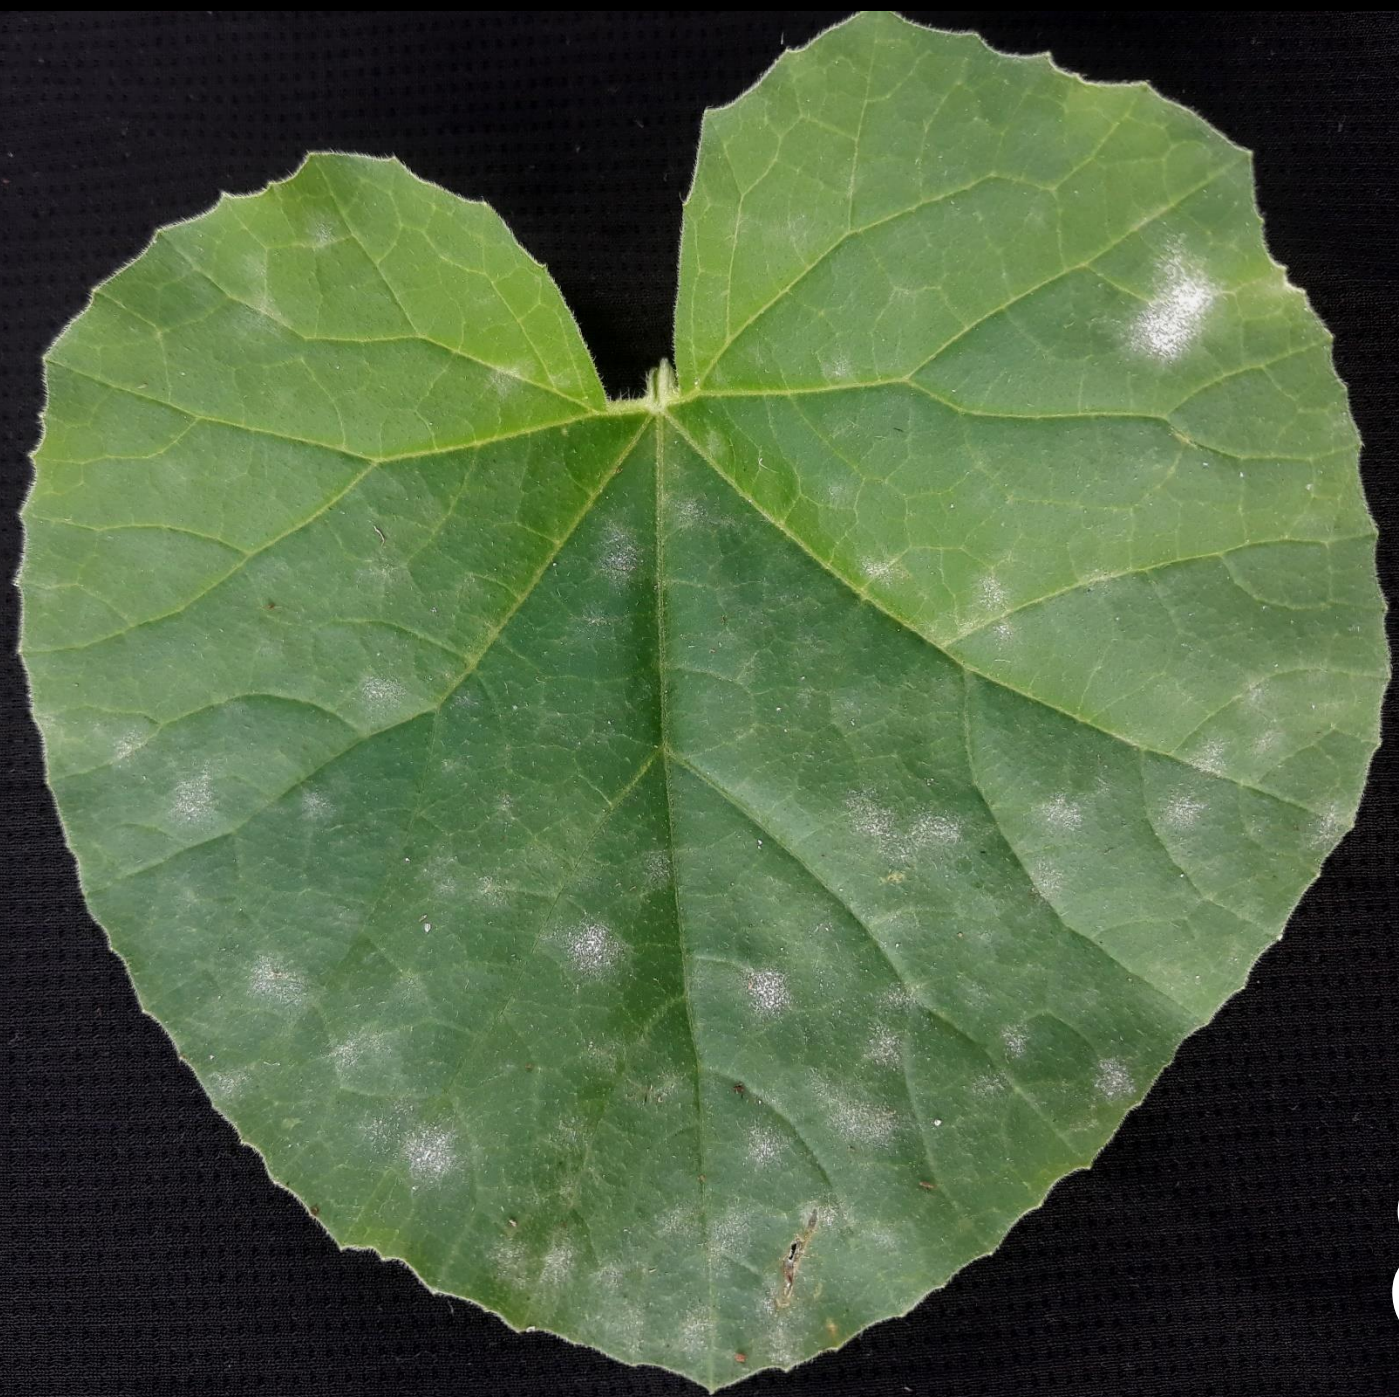

8

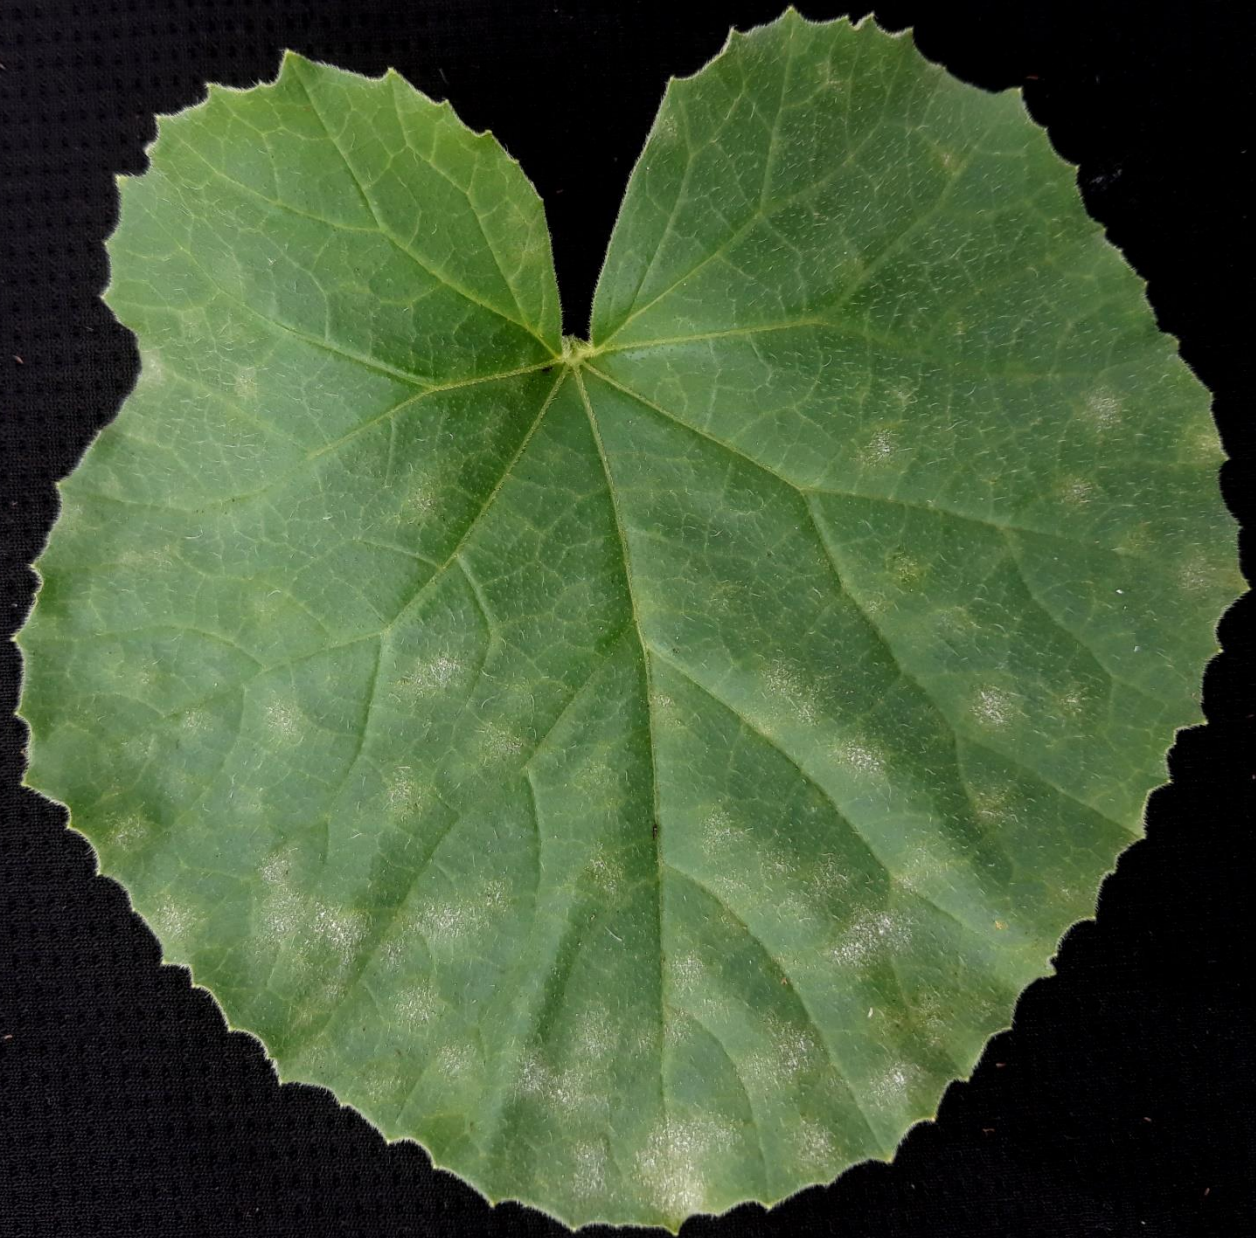

9

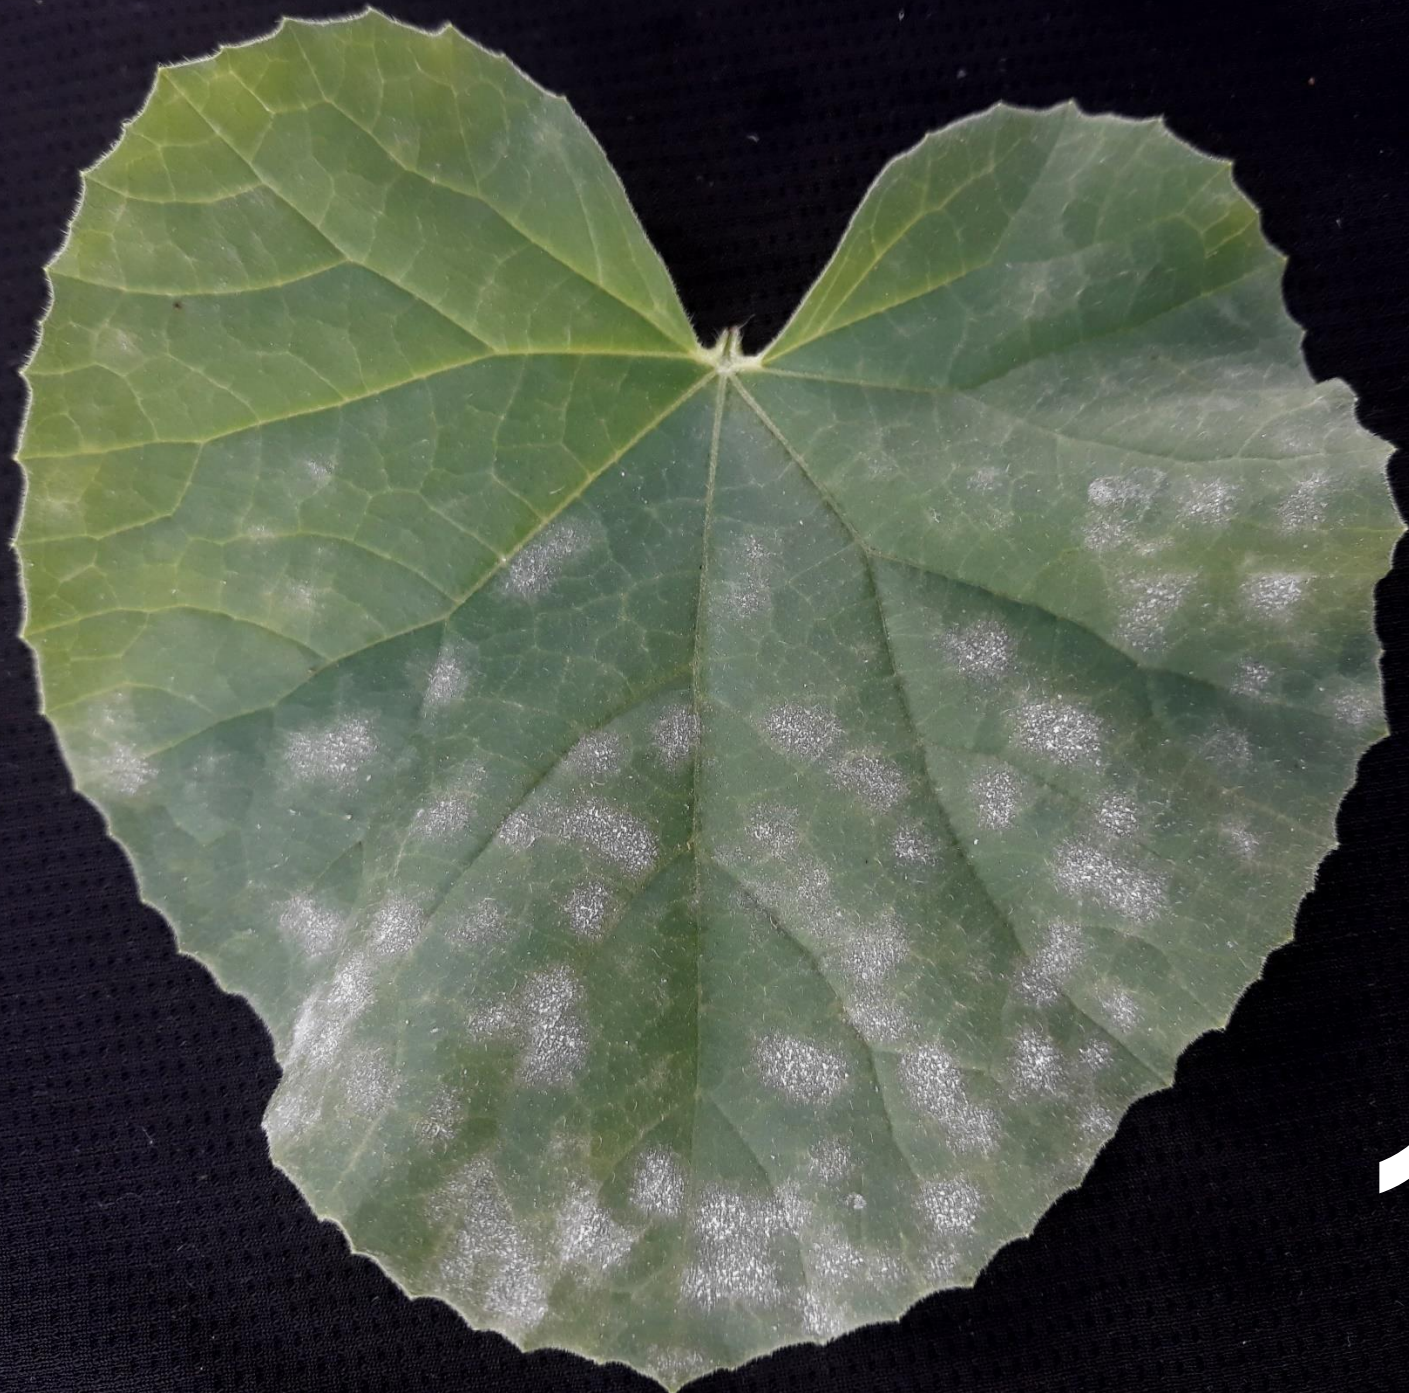

10

**WHAT ASSESSMENT METHOD DID YOU  
JUST USE TO RATE DISEASE SEVERITY?**

# NON-GRADED QUIZ

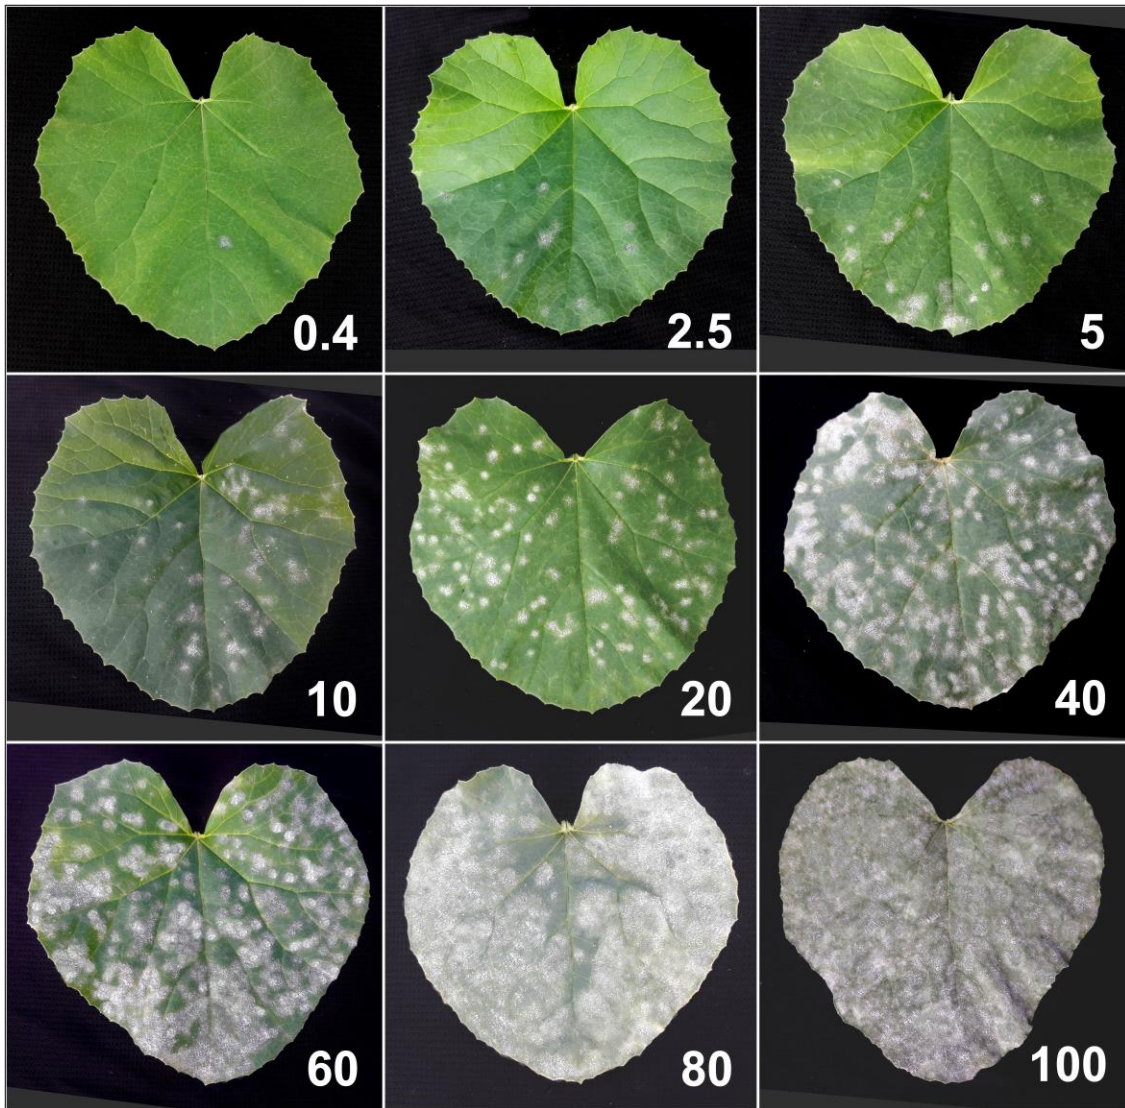

Now, you're going to rate the same pictures, but in random order, with the help of this diagram set.

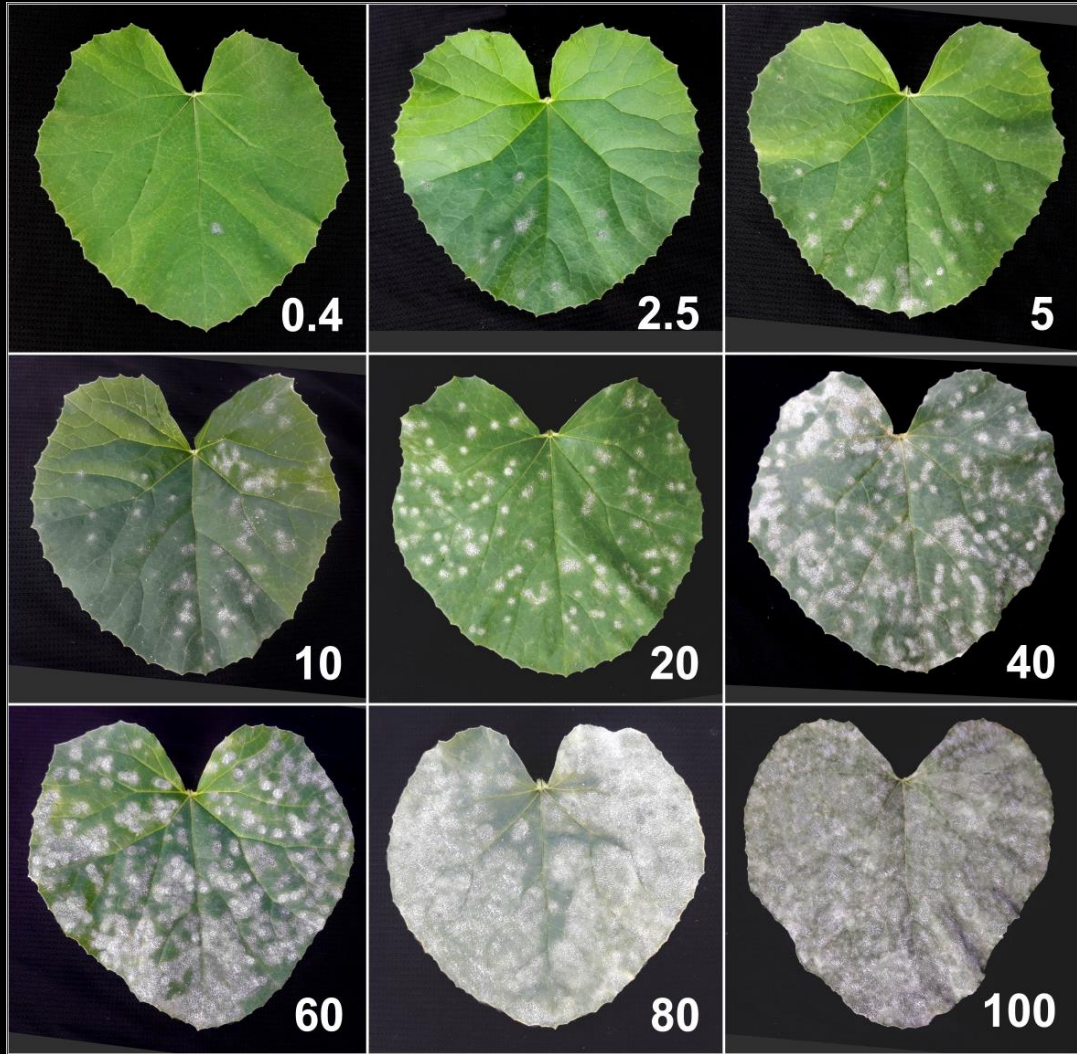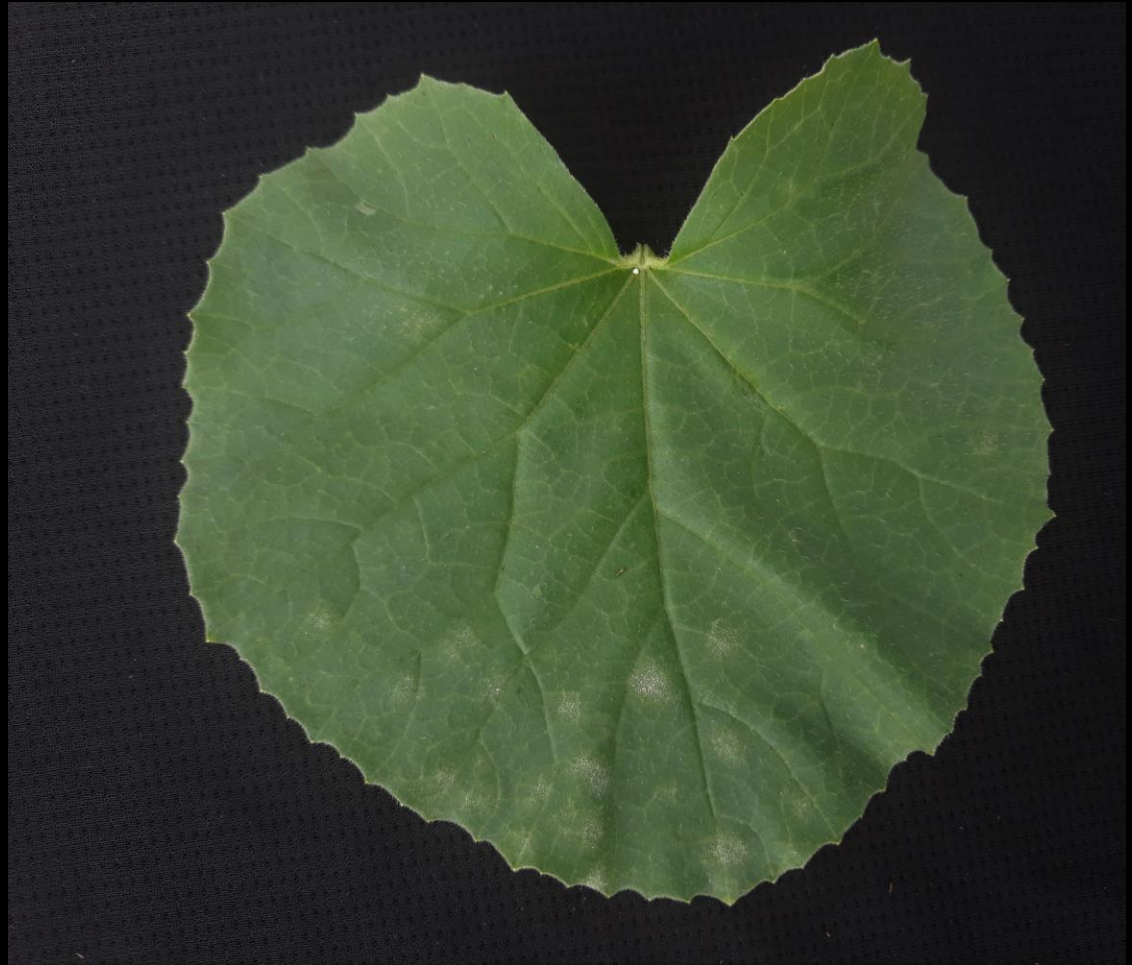

1



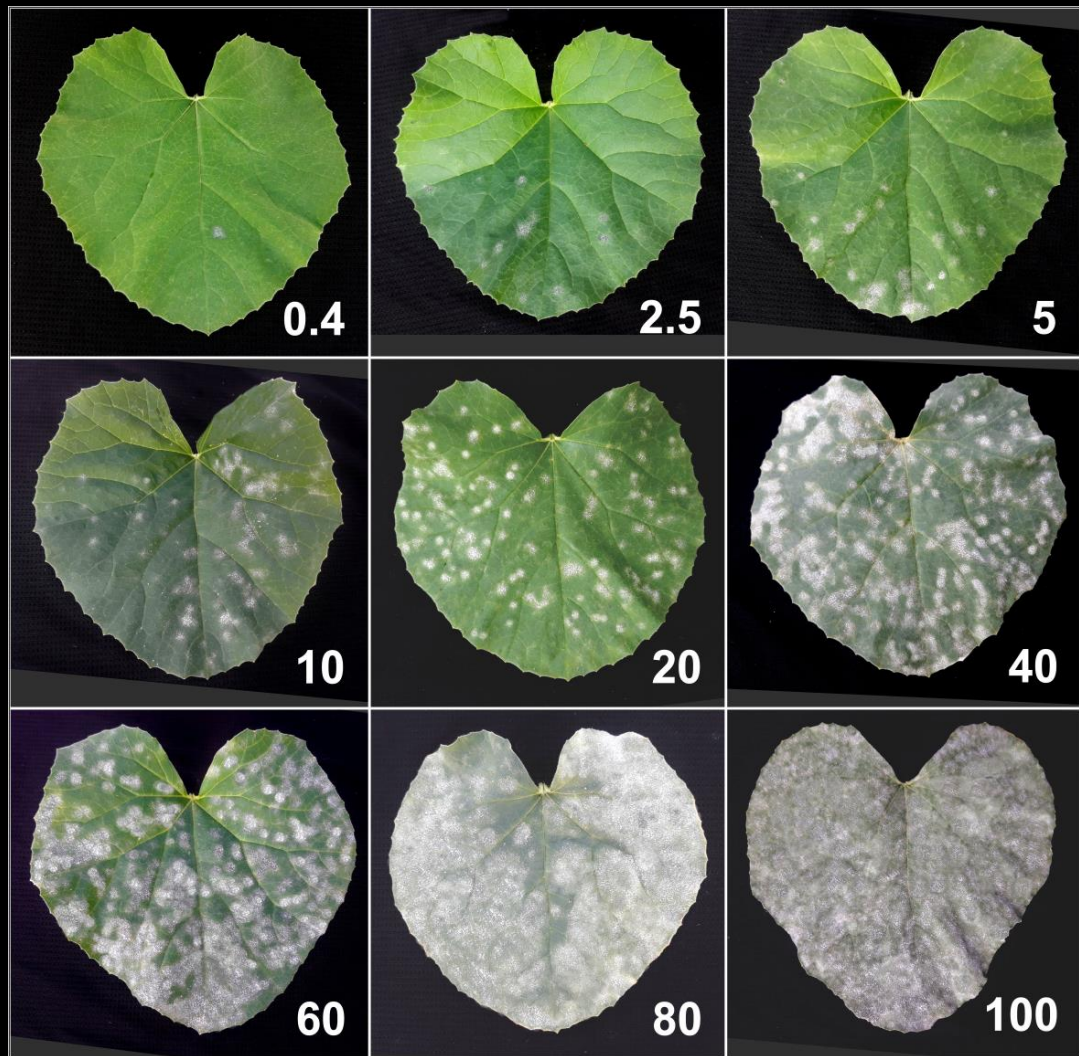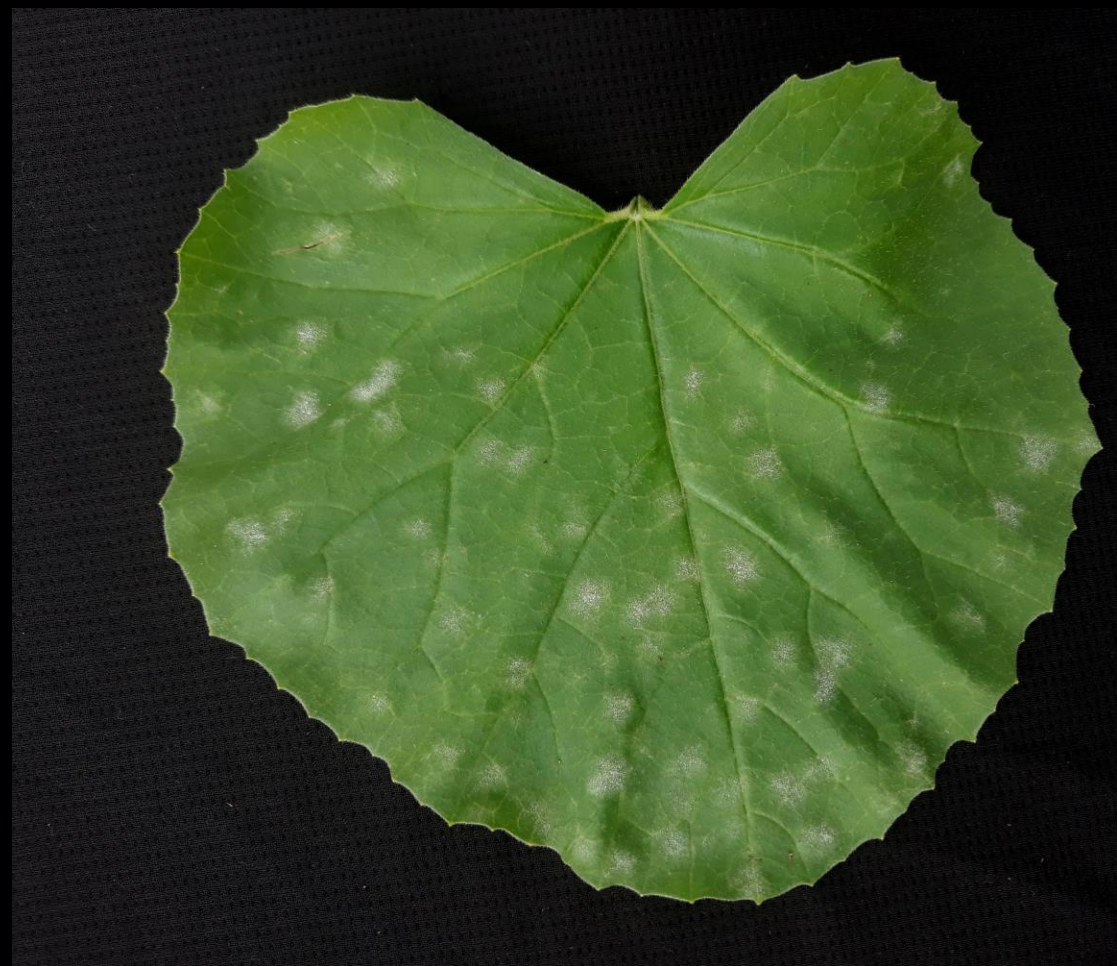

2

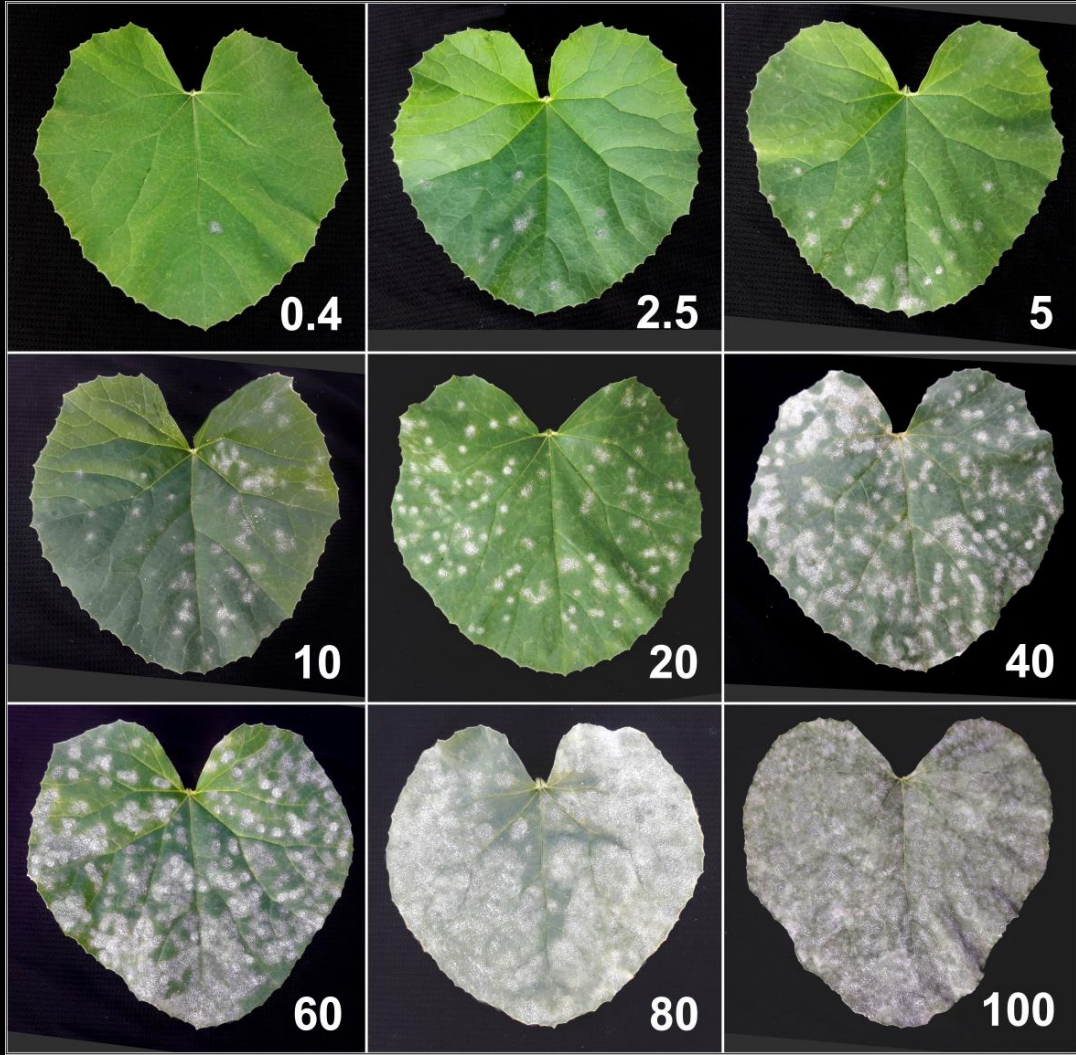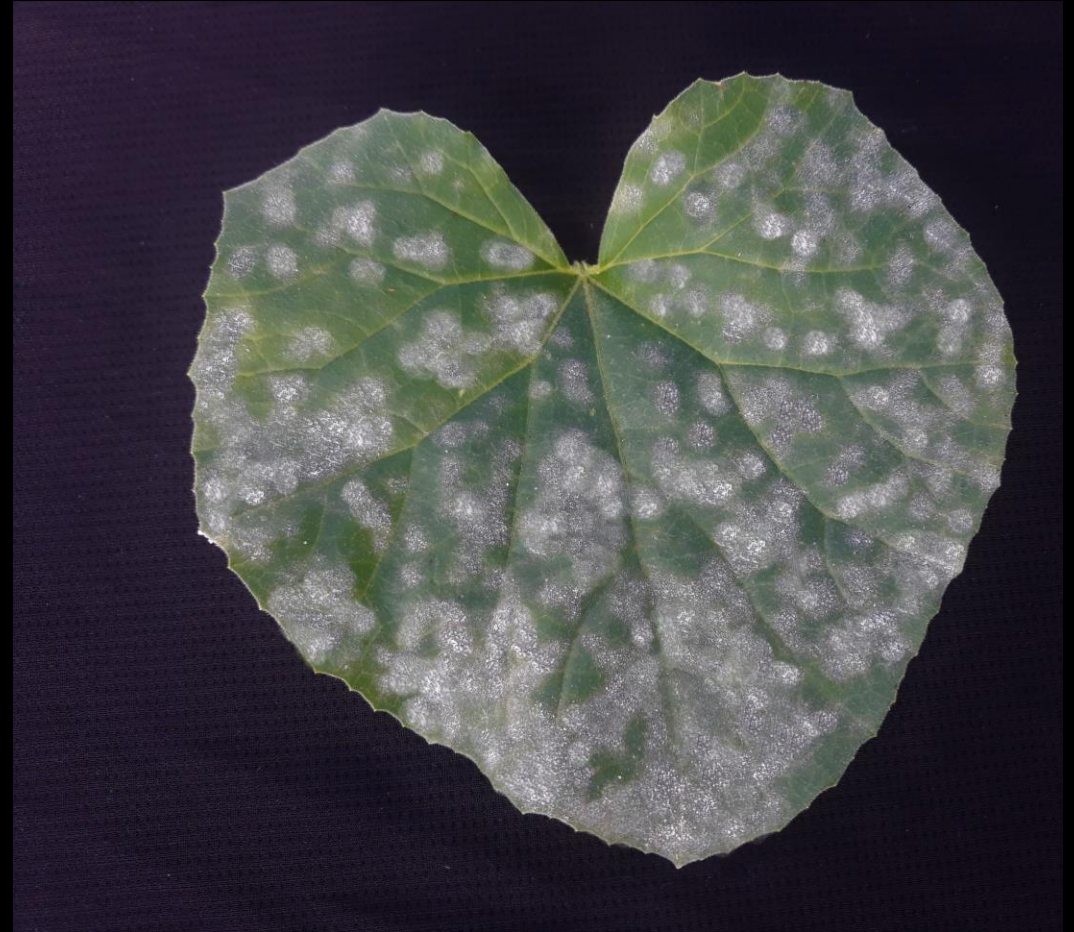

3

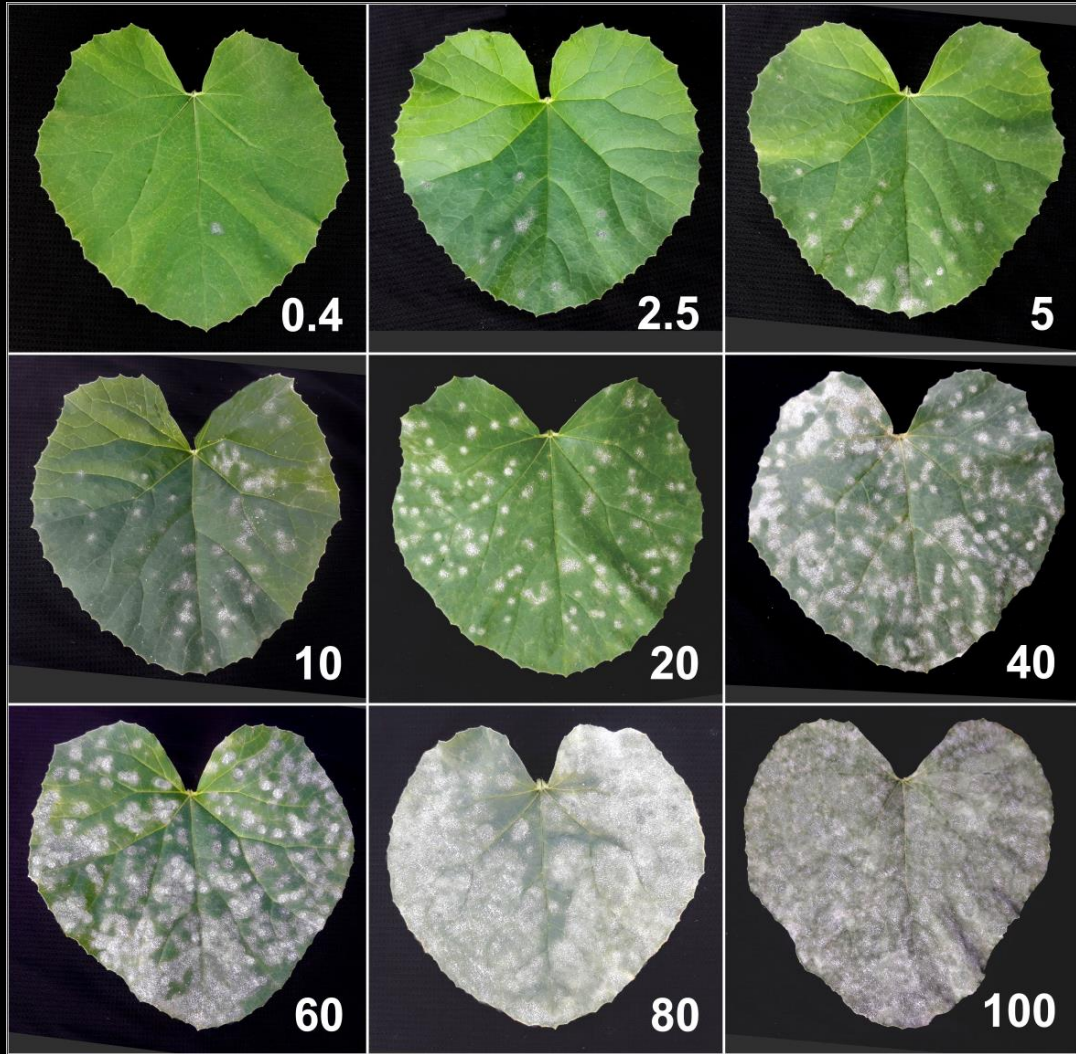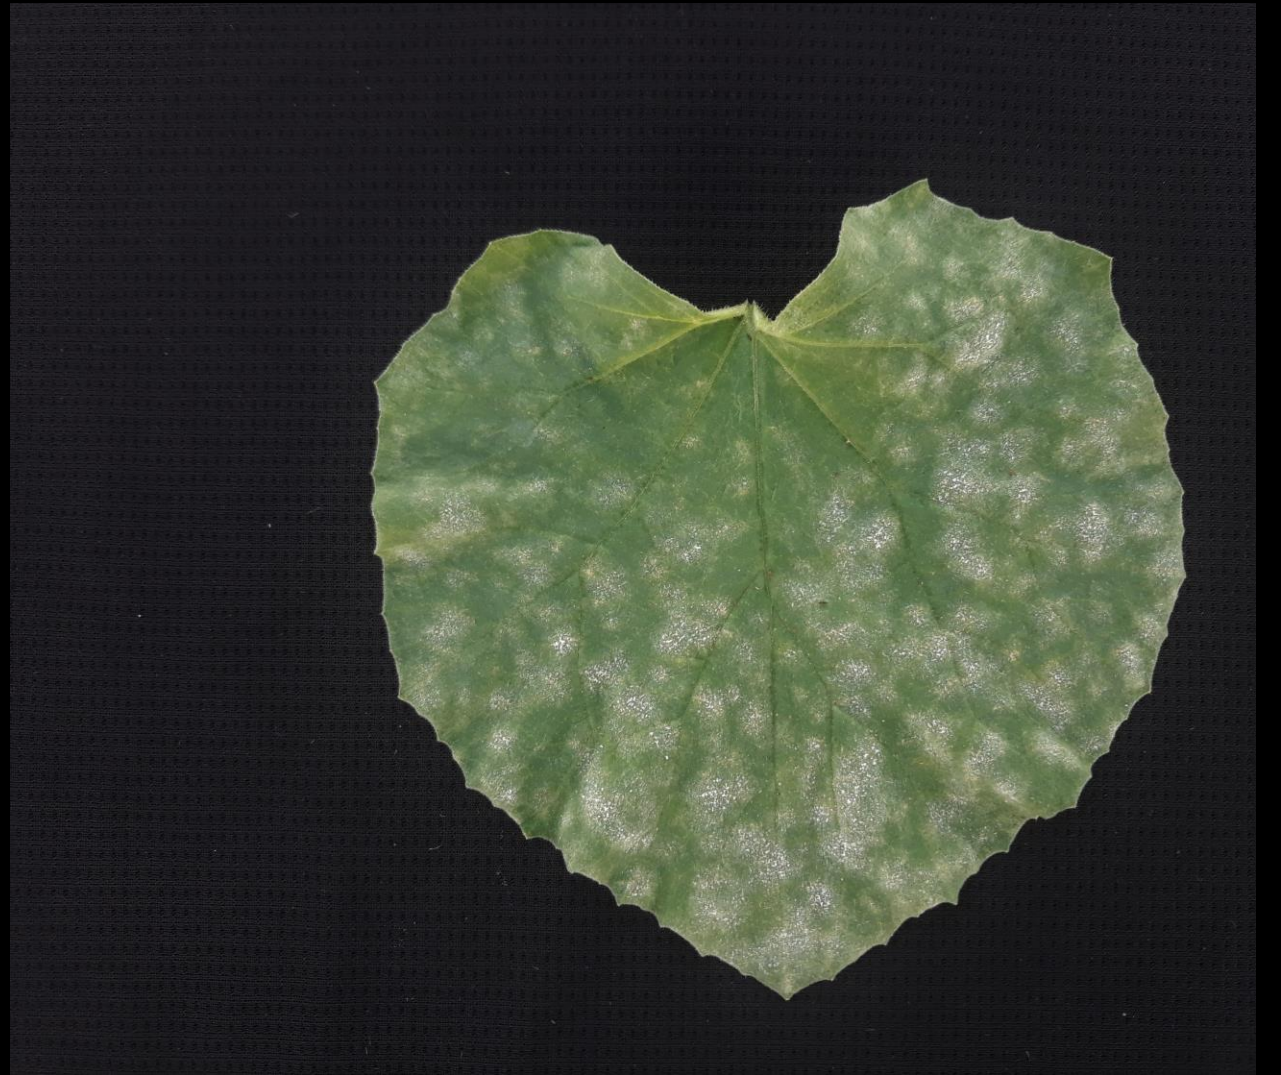

4

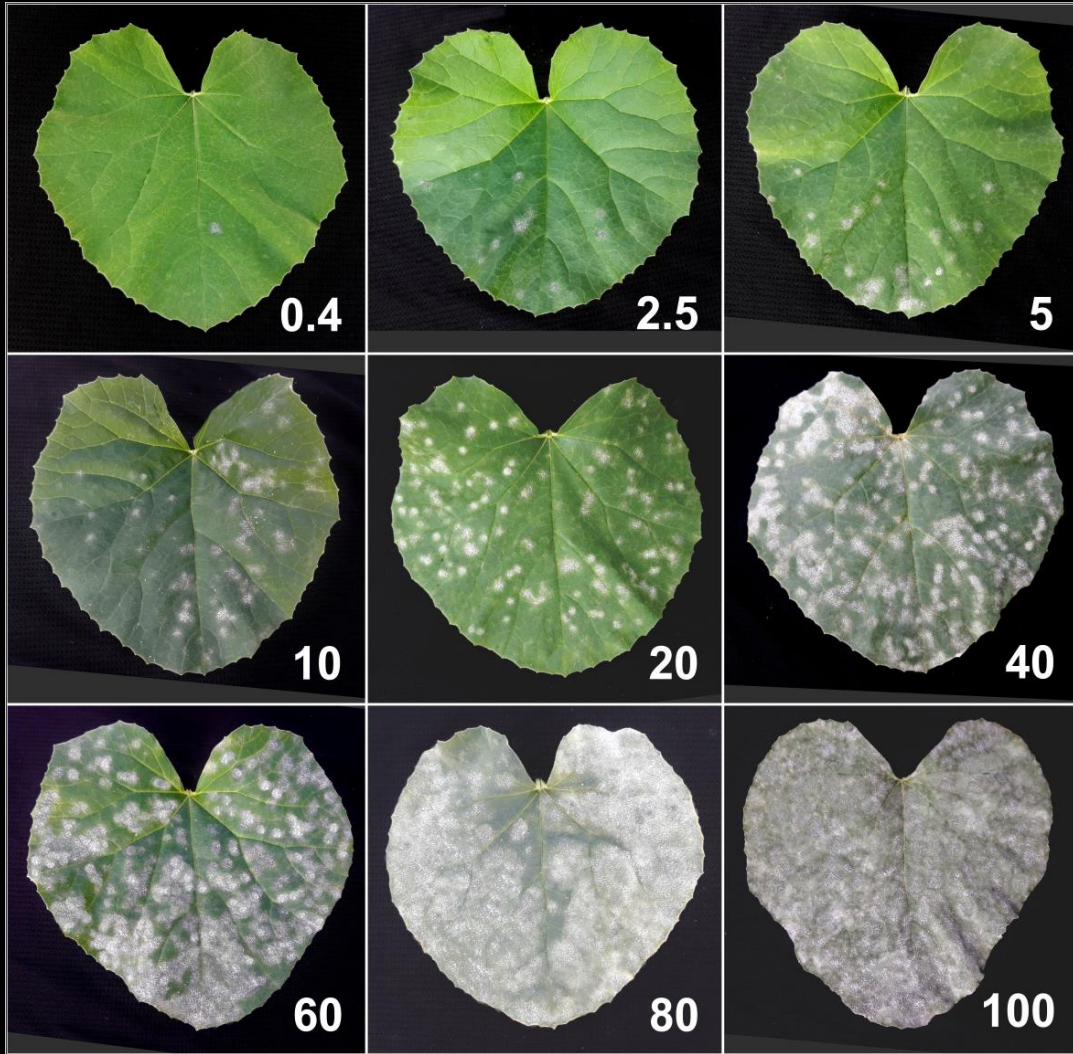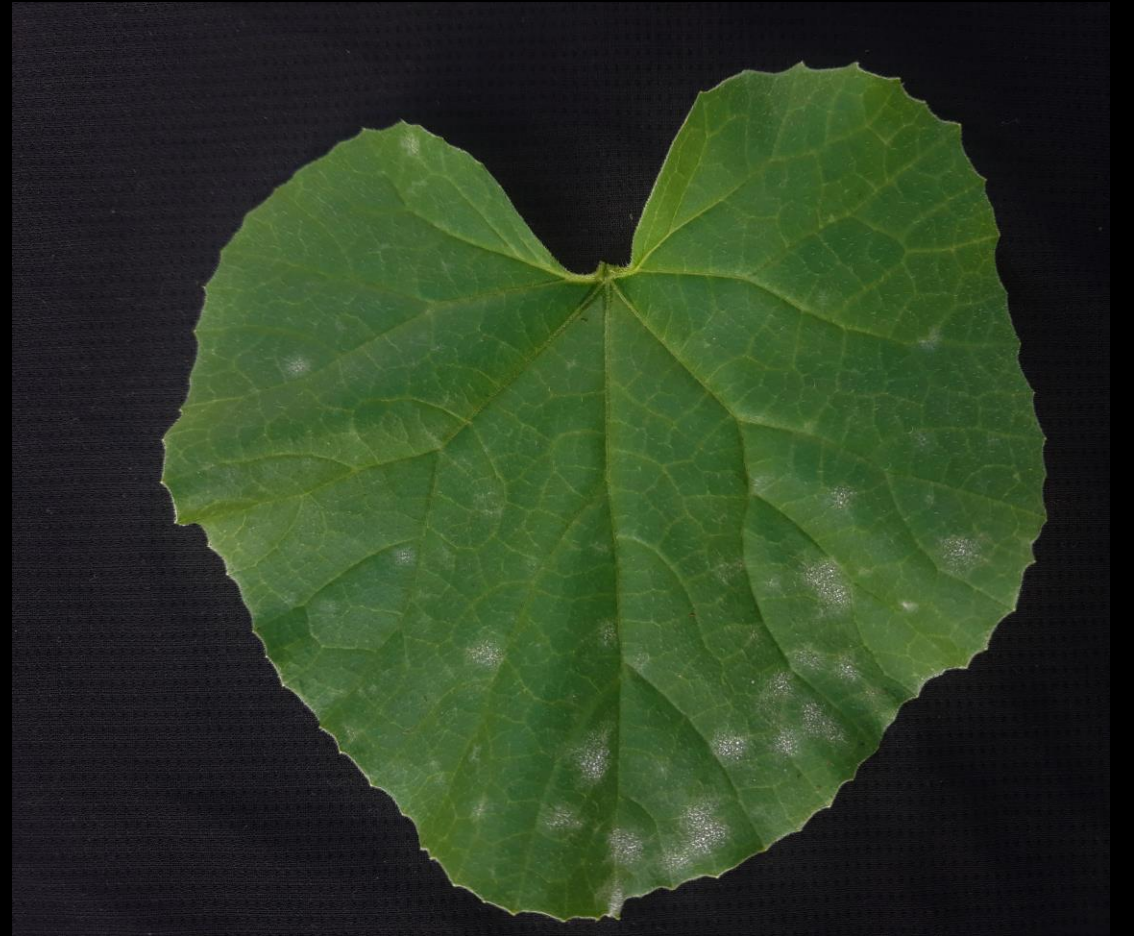

5

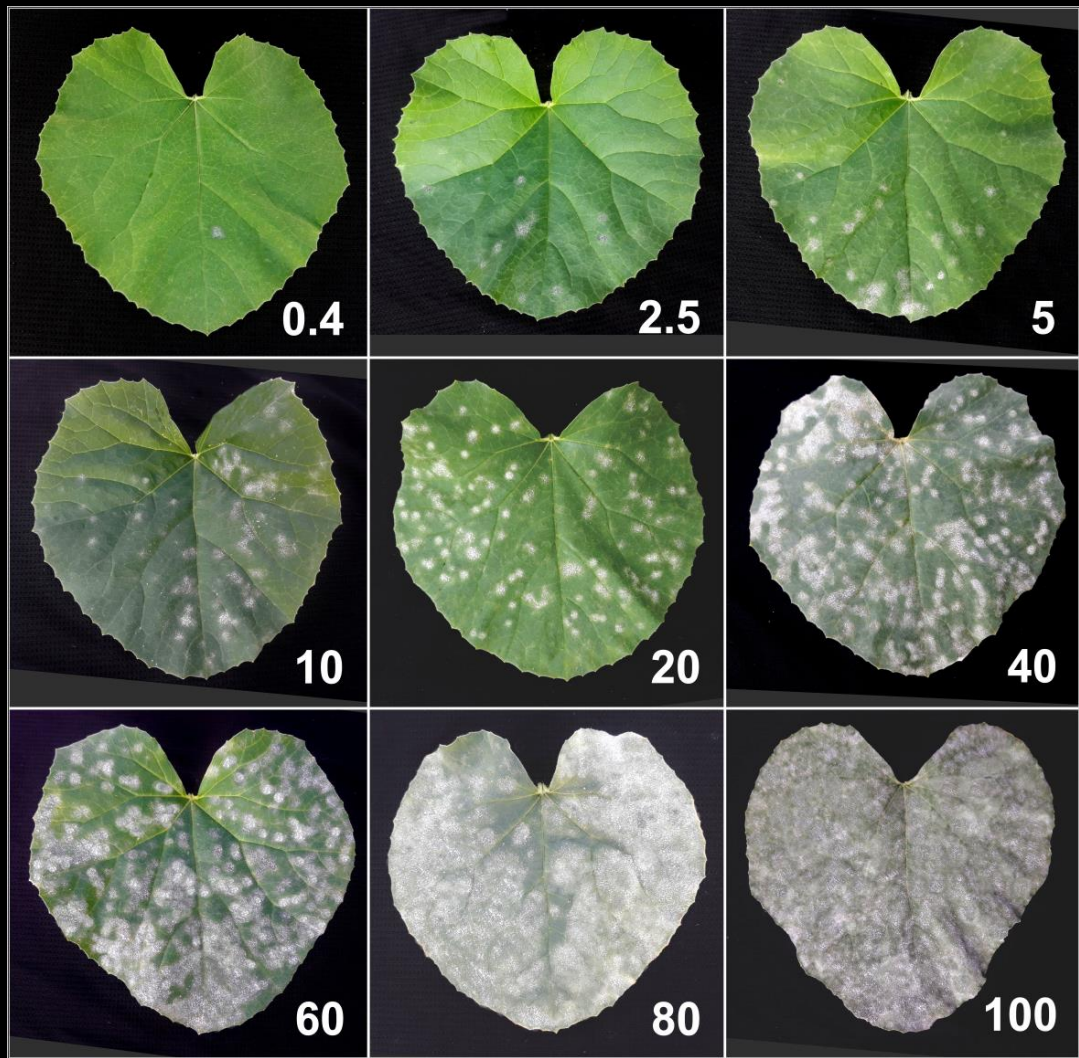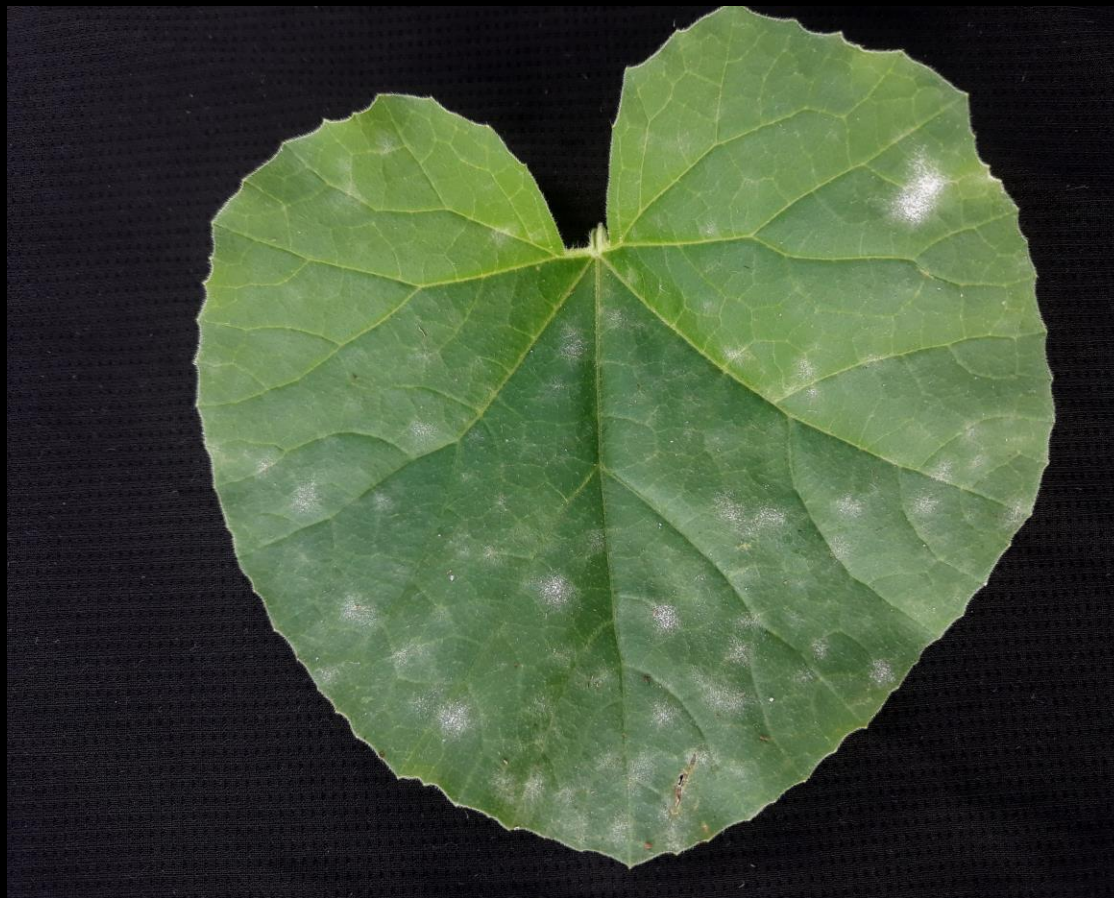

6

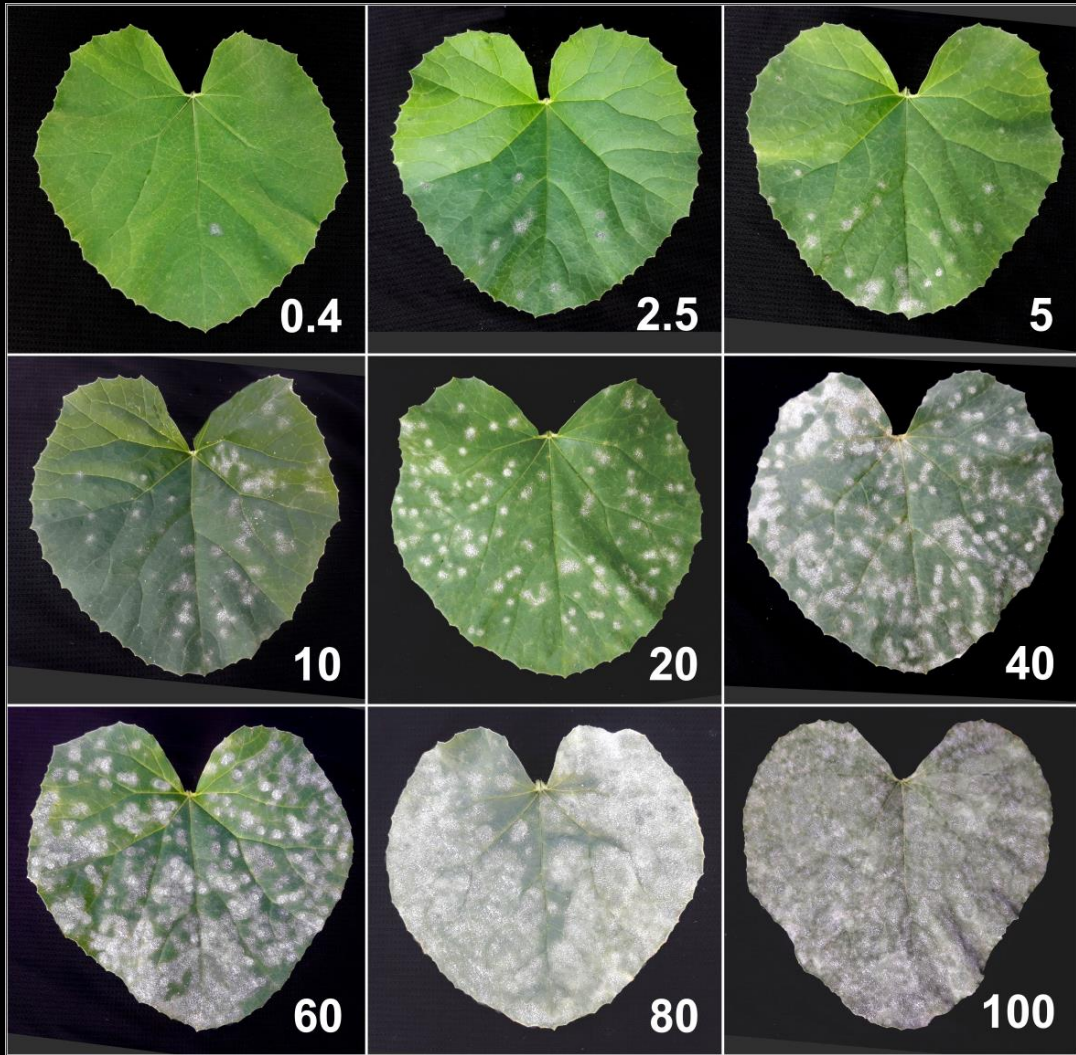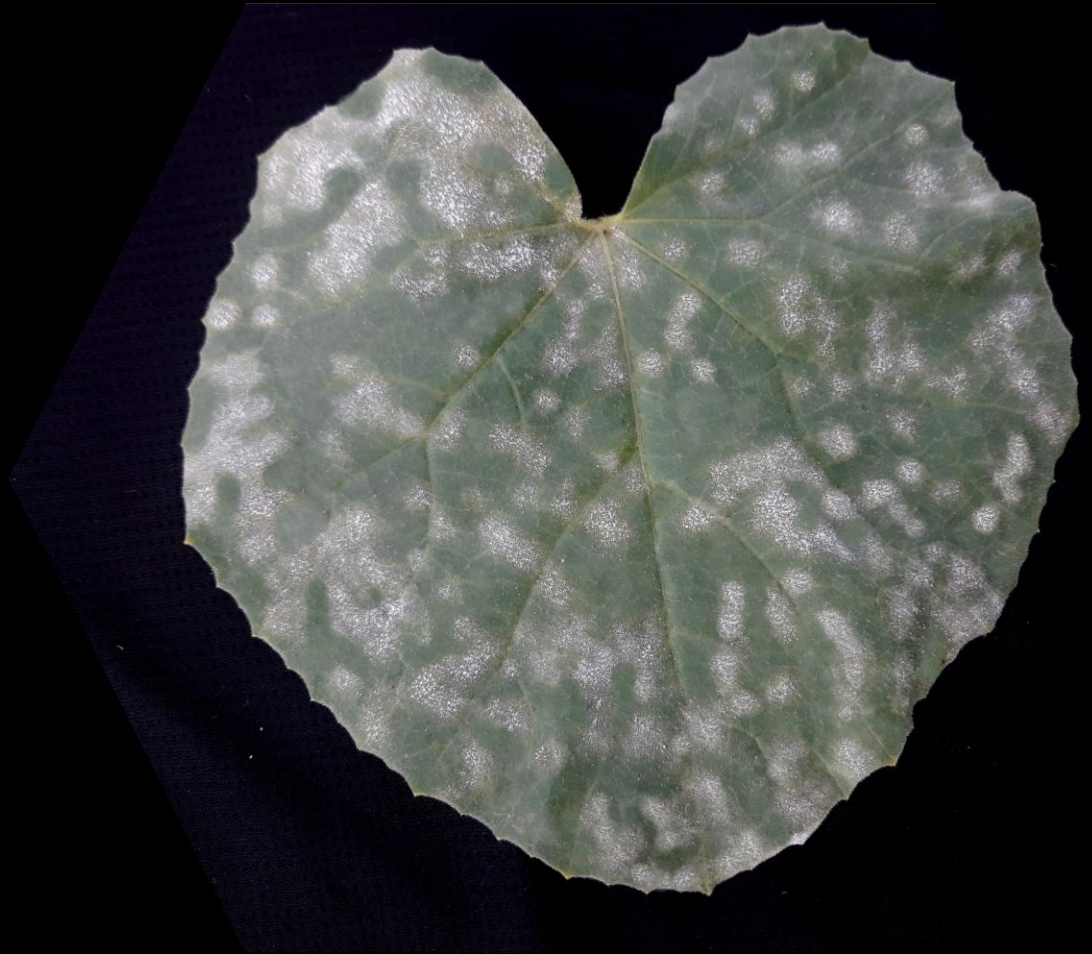

7

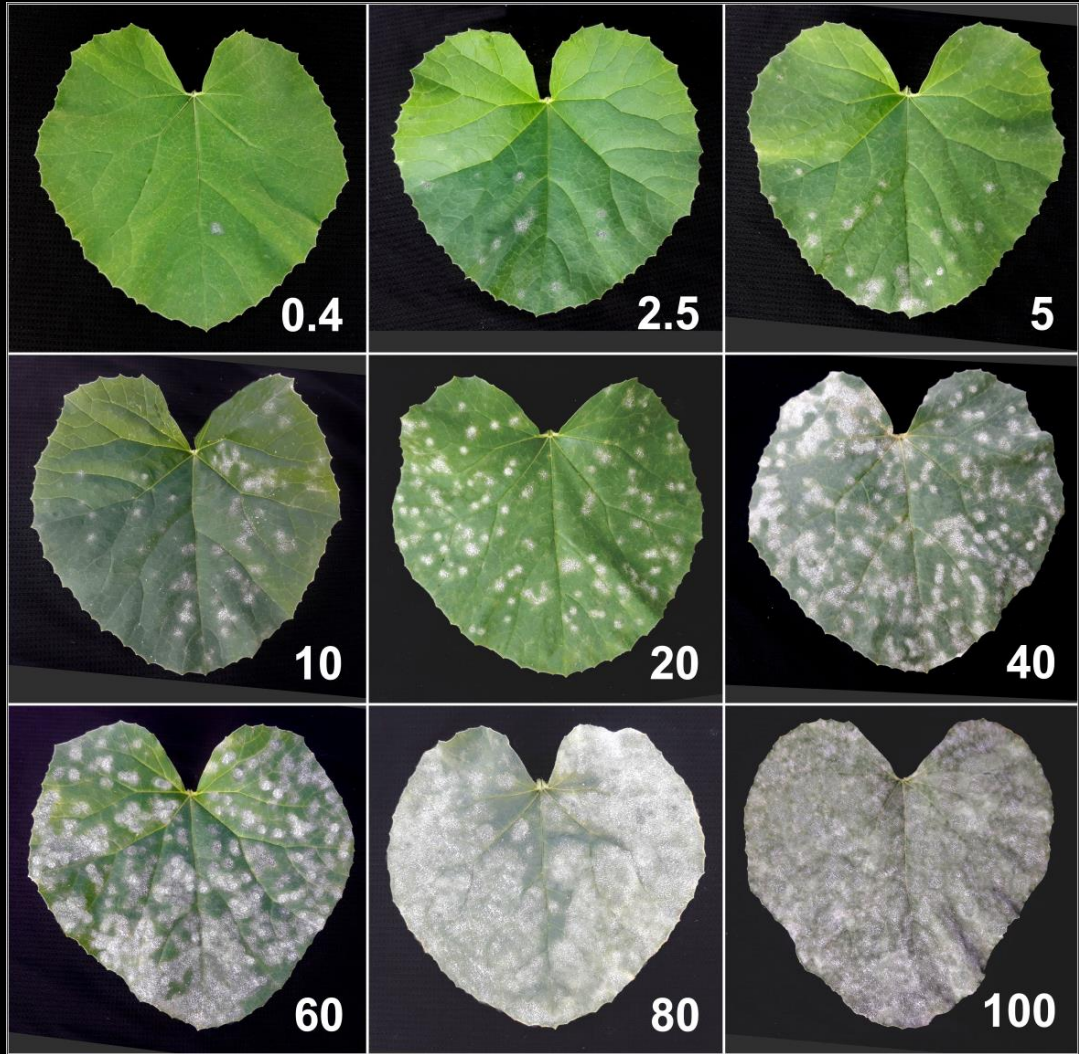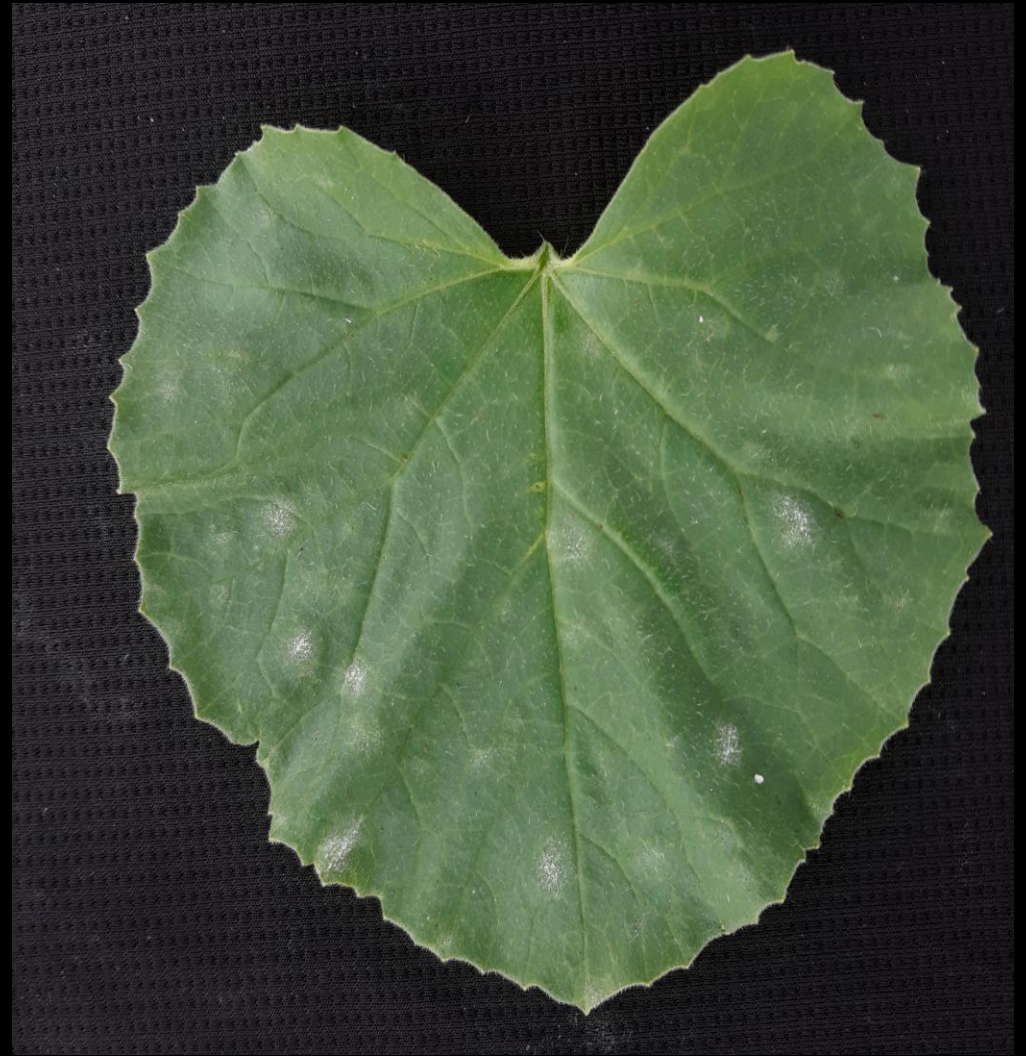

8

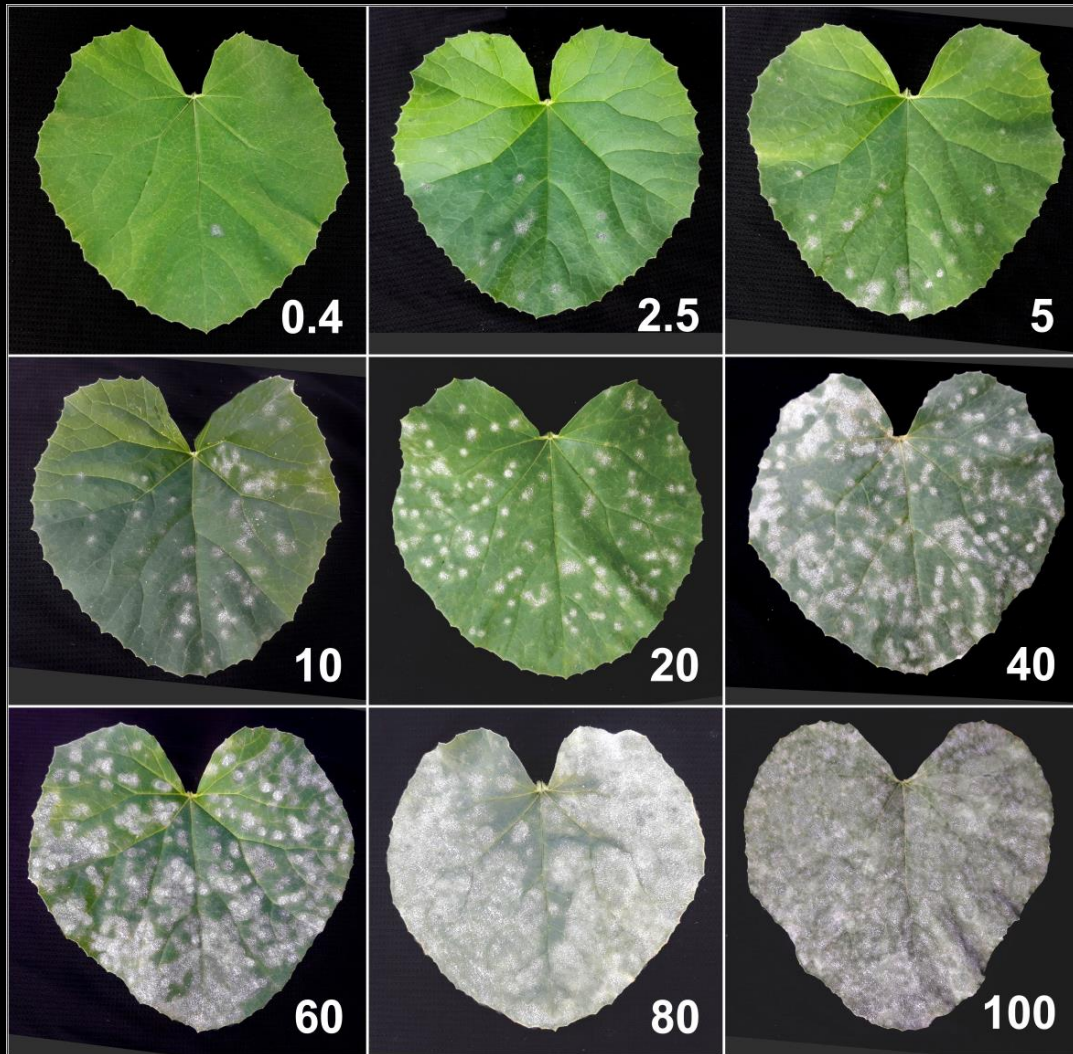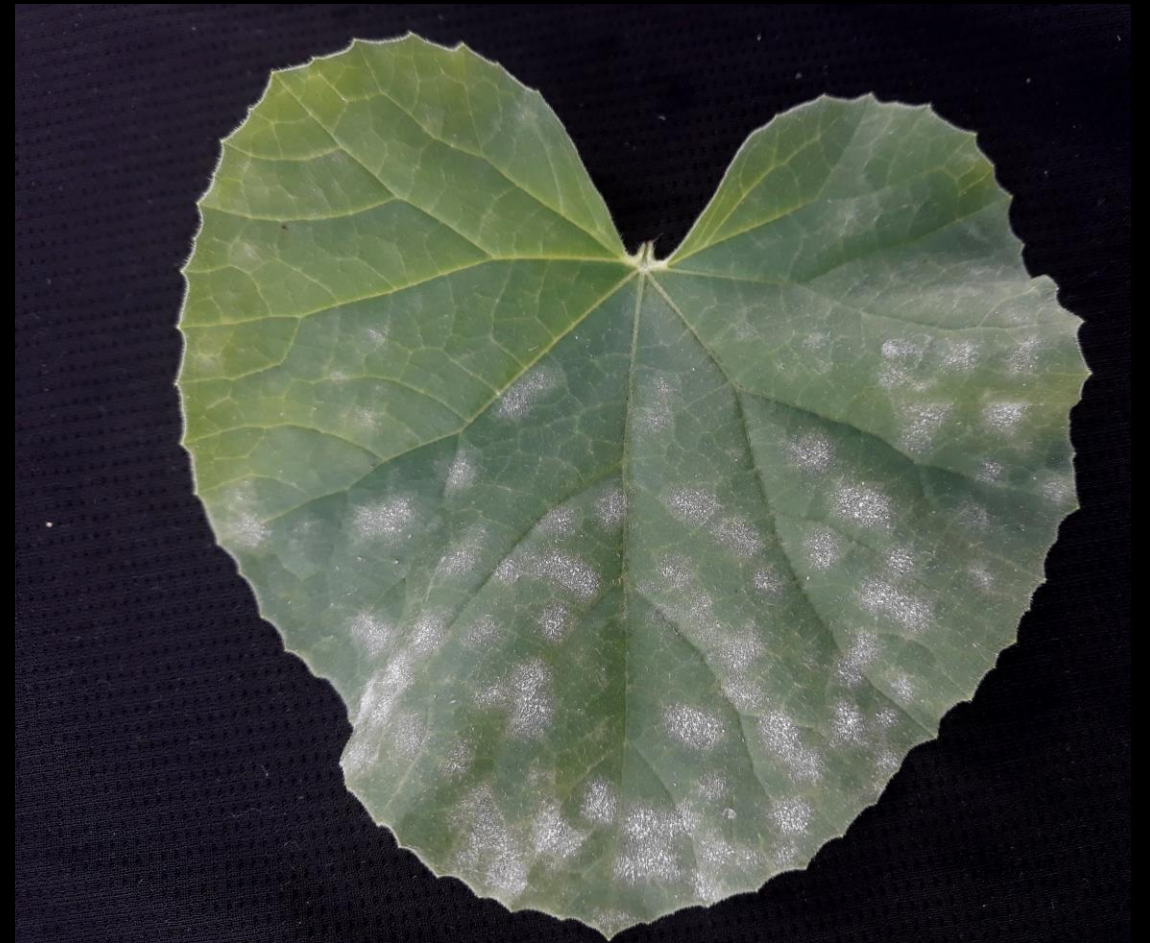

9



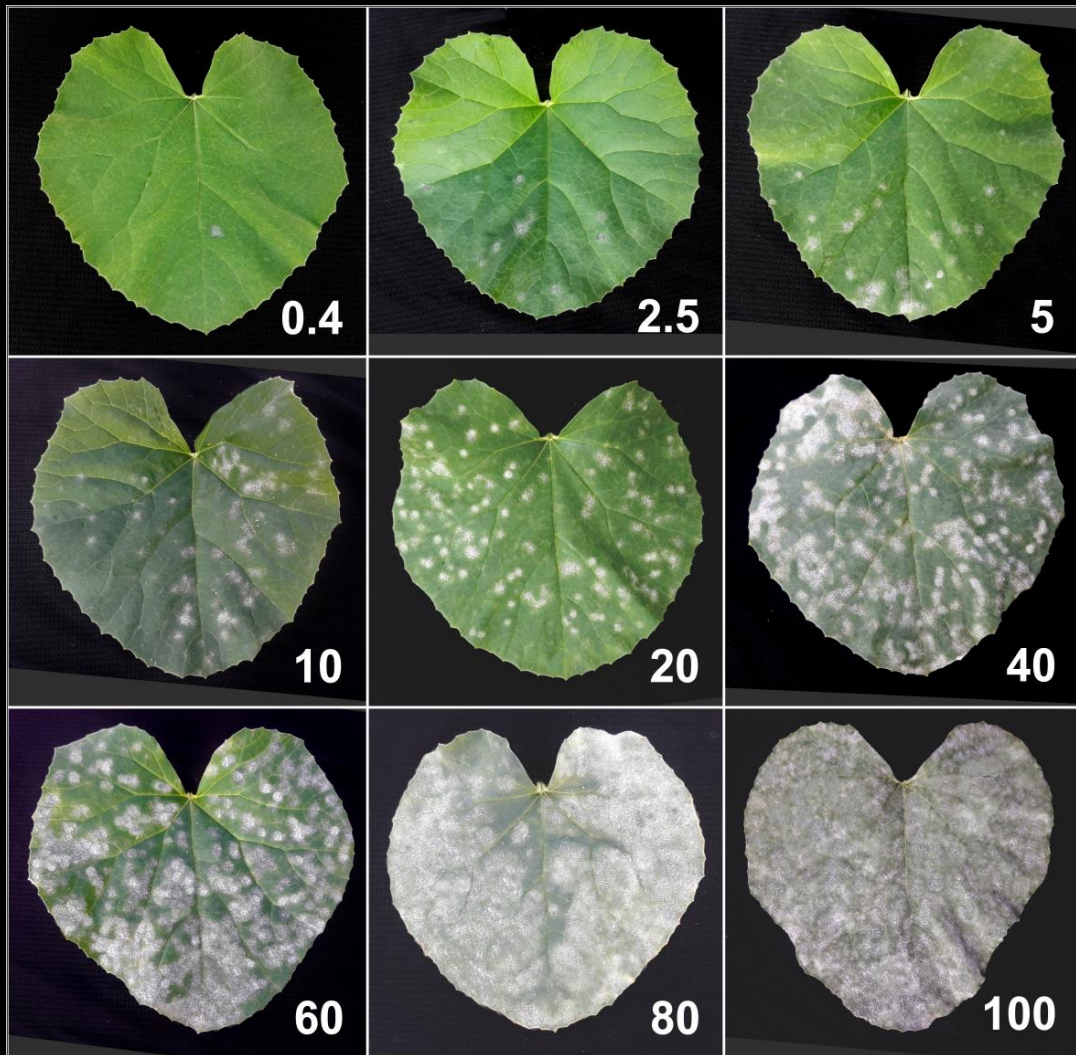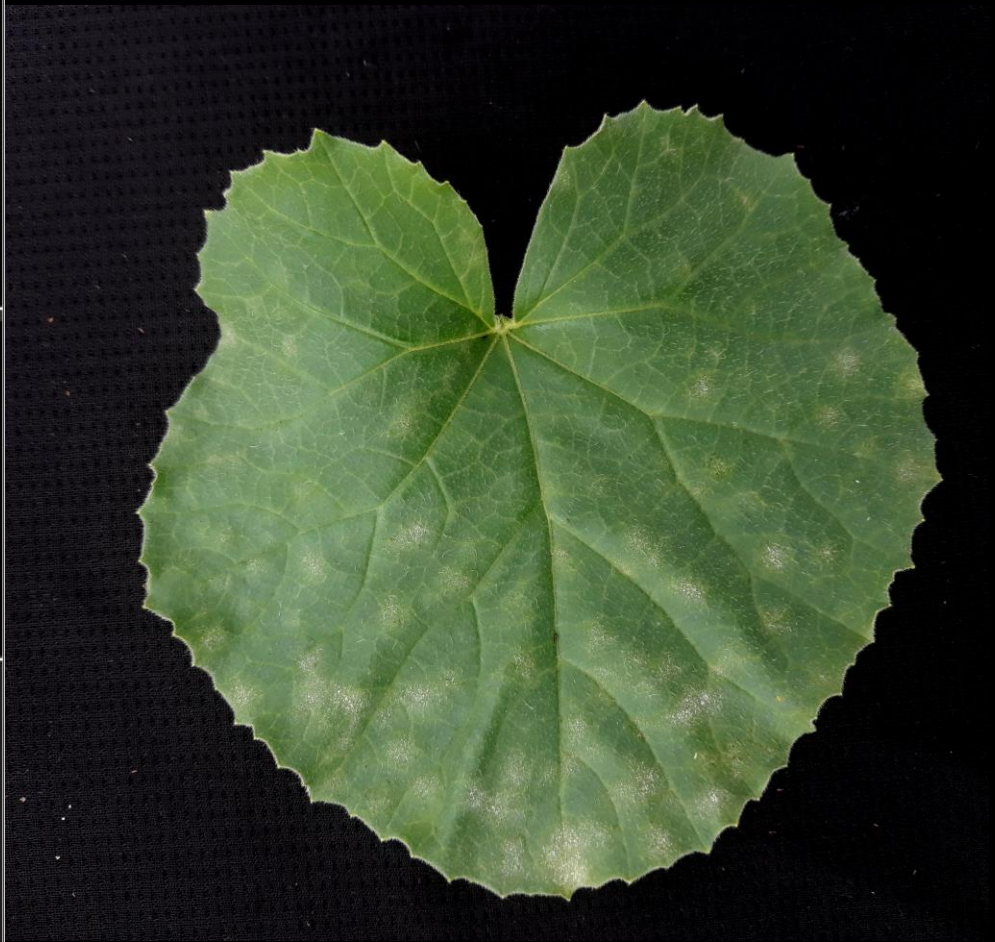

10

# GRADED ASSIGNMENT

- Students are required to submit their final report, which should include a foliar fungal disease, a description of symptoms, and the method used to assess the selected disease
- In class, we will discuss any problems or situations that students may have encountered during their literature review and disease assessment
- Students will be encouraged to share the strengths and weaknesses of their assessment methodology and recommendations
- The final assignment will be graded based on an assessment rubric worth 25 points.

# REAL SEVERITY VALUES

| <b>Order Number</b> | <b>Severity Without diagram</b> | <b>Match</b> | <b>Order Number</b> | <b>Severity With diagram</b> |
|---------------------|---------------------------------|--------------|---------------------|------------------------------|
| 1                   | 9.5                             | 4            | 1                   | 2.1                          |
| 2                   | 40                              | 1            | 2                   | 9.5                          |
| 3                   | 40.1                            | 5            | 3                   | 60                           |
| 4                   | 2.1                             | 3            | 4                   | 40.1                         |
| 5                   | 60                              | 6            | 5                   | 4.4                          |
| 6                   | 4.4                             | 8            | 6                   | 9.6                          |
| 7                   | 5.3                             | 2            | 7                   | 40                           |
| 8                   | 9.6                             | 7            | 8                   | 5.3                          |
| 9                   | 9.8                             | 10           | 7                   | 23.4                         |
| 10                  | 23.4                            | 9            | 10                  | 9.8                          |



*Thank You!*

# REFERENCES

- Bock, C.H., Barbedo, J.G.A., Del Ponte, E.M., Bohnenkamp, D., Mahlein, A.-K. 2020. From visual estimates to fully automated sensor-based measurements of plant disease severity: status and challenges for improving accuracy. *Phytopathol. Res.*, 2 (2020), p. 9, 10.1186/s42483-020-00049-8.
- Lopes, U. P., Alonzo, G., Onofre, R. B., Melo, P. P., Vallad, G. E., Gadoury, D. M. and Peres, N. A. 2023. Effective management of powdery mildew in cantaloupe plants using nighttime applications of UV light. *Plant Dis.* <https://doi.org/10.1094/PDIS-08-22-1941-RE>.
- Schneider, Steven & Da Graca, John & Skaria, M. & Little, Christopher & Setamou, Mamoudou & Kunta, Madhurababu. 2013. A Visual Rating Scale for Quantifying the Severity of Greasy Spot Disease on Grapefruit Leaves. *International Journal of Fruit Science*. 13. 459-465. 10.1080/15538362.2013.789273.
